# Supplementary material for: Peer-led family-centred problem management plus for immigrants (PMP-I) for mental health promotion among immigrants in USA: protocol for a pilot, randomised controlled feasibility trial
Source: PubMed Central journal article supplement (PMC9097550; doi:10.1136/bmjopen-2022-061353), 2022-04-28
Supplement: bmjopen-2022-061353.draft_revisions.pdf [file bmjopen-2022-061353.draft_revisions.pdf]

# BMJ Open

BMJ Open is committed to open peer review. As part of this commitment we make the peer review history of every article we publish publicly available.

When an article is published we post the peer reviewers' comments and the authors' responses online. We also post the versions of the paper that were used during peer review. These are the versions that the peer review comments apply to.

The versions of the paper that follow are the versions that were submitted during the peer review process. They are not the versions of record or the final published versions. They should not be cited or distributed as the published version of this manuscript.

BMJ Open is an open access journal and the full, final, typeset and author-corrected version of record of the manuscript is available on our site with no access controls, subscription charges or pay-per-view fees (<http://bmjopen.bmj.com>).

If you have any questions on BMJ Open's open peer review process please email [info.bmjopen@bmj.com](mailto:info.bmjopen@bmj.com)

# BMJ Open

## Peer-led family-centered Problem Management Plus for Immigrants (PMP-I) for mental health promotion among immigrants in the United States: a study protocol for a randomized controlled trial

|                               |                                                                                                                                                                                                                                                                                                                                                                                                                                                                                                                                                                                                                                                      |
|-------------------------------|------------------------------------------------------------------------------------------------------------------------------------------------------------------------------------------------------------------------------------------------------------------------------------------------------------------------------------------------------------------------------------------------------------------------------------------------------------------------------------------------------------------------------------------------------------------------------------------------------------------------------------------------------|
| Journal:                      | <i>BMJ Open</i>                                                                                                                                                                                                                                                                                                                                                                                                                                                                                                                                                                                                                                      |
| Manuscript ID                 | bmjopen-2022-061353                                                                                                                                                                                                                                                                                                                                                                                                                                                                                                                                                                                                                                  |
| Article Type:                 | Protocol                                                                                                                                                                                                                                                                                                                                                                                                                                                                                                                                                                                                                                             |
| Date Submitted by the Author: | 22-Jan-2022                                                                                                                                                                                                                                                                                                                                                                                                                                                                                                                                                                                                                                          |
| Complete List of Authors:     | Poudel-Tandukar, Kalpana ; University of Massachusetts Amherst, Nursing<br>Jacelon, Cynthia; University of Massachusetts Amherst<br>Martell, Christopher; University of Massachusetts Amherst<br>Poudel, Krishna C. ; University of Massachusetts Amherst, Public Health and Health Sciences<br>Rai, Shan; Bhutanese Christian Society of Western Massachusetts<br>Ramdam, Razu; Bhutanese Christian Society of Western Massachusetts<br>Laws, Holly; University of Massachusetts Amherst<br>Meyer, Jerrold; University of Massachusetts Amherst<br>Bertone-Johnson, E; University of Massachusetts Amherst<br>Hollon, Steven; Vanderbilt University |
| Keywords:                     | EPIDEMIOLOGY, MENTAL HEALTH, PSYCHIATRY, PREVENTIVE MEDICINE                                                                                                                                                                                                                                                                                                                                                                                                                                                                                                                                                                                         |
|                               |                                                                                                                                                                                                                                                                                                                                                                                                                                                                                                                                                                                                                                                      |

SCHOLARONE™  
Manuscripts

1  
2  
3 **Peer-led family-centered Problem Management Plus for Immigrants (PMP-I) for mental**  
4 **health promotion among immigrants in the United States: a study protocol for a**  
5 **randomized controlled trial**  
6  
7  
8  
9

10  
11  
12 Kalpana Poudel-Tandukar<sup>1</sup>, Cynthia S Jacelon<sup>1</sup>, Christopher Martell<sup>2</sup>, Krishna C Poudel<sup>3</sup>, Shan  
13  
14 Rai<sup>4</sup>, Razu Ramdam<sup>4</sup>, Holly Laws<sup>2</sup>, Jerrold S Meyer<sup>2</sup>, Elizabeth R. Bertone-Johnson<sup>5</sup>, Steven D  
15  
16 Hollon<sup>6</sup>  
17  
18

19  
20  
21 <sup>1</sup>Elaine Marieb College of Nursing, University of Massachusetts Amherst, MA, USA  
22

23  
24 <sup>2</sup>Department of Psychological and Brain Sciences, College of Natural Sciences, University of  
25  
26 Massachusetts Amherst, MA, USA  
27

28  
29 <sup>3</sup> Department of Health Promotion and Policy, School of Public Health and Health Sciences,  
30  
31 University of Massachusetts Amherst, MA, USA  
32

33  
34 <sup>4</sup>Bhutanese Christian Society of Western Massachusetts, Springfield, MA, USA  
35

36  
37 <sup>5</sup>Department of Biostatistics and Epidemiology, School of Public Health and Health Sciences,  
38  
39 University of Massachusetts Amherst, MA, USA  
40

41  
42 <sup>6</sup>Department of Psychology, Vanderbilt University, Nashville, TN, USA  
43  
44

45  
46 \*Correspondence to: Kalpana Poudel-Tandukar, Ph.D., MPH, MPHIC, CGM

47 Associate Professor, Elaine Marieb College of Nursing, University of Massachusetts Amherst,  
48  
49 220 Skinner Hall, 651 North Pleasant St, Amherst, MA 01003-9299, USA  
50

51  
52 Tel: 1-413-545-5095; Fax: 1-413-577-2500  
53

54  
55 Email: [kalpana@umass.edu](mailto:kalpana@umass.edu)  
56  
57

## Abstract

### Introduction

Research is needed to investigate potential preventive strategies to reduce stress and mental health burden and assess effective implementation among refugees and immigrants. Problem Management Plus (PMP) is a low-intensity multicomponent psychological intervention developed by the World Health Organization (WHO) that trained laypeople can deliver. PMP has been adapted as a prevention intervention and developed as Problem Management Plus for Immigrants (PMP-I), including psychoeducation, problem-solving, behavioral activation, and mind-body exercise, to address immigrants' multiple socio-cultural and emotional stressors. This trial aims to estimate the magnitude of the difference between PMP-I vs. community support services pamphlets on the primary outcomes of interest (stress, anxiety, and depressive symptoms) to inform the design of a large-scale intervention.

### Methods and analysis

This trial will test preliminary effects of PMP-I vs. community support services pamphlets in a randomized controlled trial (N=116 families; 58 families for each condition intervention and control) on stress, anxiety, and depressive symptoms (primary outcomes), chronic physiological stress assessed in hair cortisol (secondary outcomes), and coping, family conflict resolution, and social networking (targets), with assessment at baseline, post-intervention, and 3-month post-intervention. Eligibility criteria for the primary study participants include Bhutanese adults 18 years or older resettled in Massachusetts with a score of 14 or below on the Patient Health Questionnaire (PHQ-9), a screening tool to exclude individuals with depressive symptoms (score

1  
2  
3 of 15 and more). All family members will be invited to participate in the family-based  
4  
5 intervention (1-session/week for 5-week). Multilevel modeling will compare the longitudinal  
6  
7 change in outcomes for each treatment arm while accounting for the clustering of participants  
8  
9 within families.  
10  
11  
12  
13

### 14 **Ethics and dissemination**

15  
16  
17 The Institutional Review Board of the University of Massachusetts Amherst approved this study.

18  
19 The study results will be disseminated in peer-reviewed journal and conferences.  
20  
21  
22  
23

24 **Trial registration number:** NCT04453709

25  
26 Prospectively registered on 1<sup>st</sup> July 2020. Recruitment of participants was delayed due to the  
27  
28 COVID-19 pandemic and has started on August 17, 2021.  
29  
30  
31  
32

33 **Keywords:** Anxiety; Depression; Emotional Wellbeing; Mind-Body Intervention; Refugees;  
34  
35 Social Wellbeing; Stress  
36  
37  
38  
39

40 **Running title:** Problem Management Plus for Immigrants in Bhutanese adults  
41  
42  
43  
44  
45  
46  
47  
48  
49  
50  
51  
52  
53  
54  
55  
56  
57  
58  
59  
60

### Strengths and limitations of the study

- Whereas existing mental health interventions for immigrants are primarily based on treatment models to improve the access and quality of care for those with diagnosed mental health problems, this study is focused on developing, implementing, and pilot testing an effect of a culturally-tailored preventative behavioral intervention to reduce stress and prevent mental health problems among immigrants.
- This study includes culturally-tailored psychoeducation, behavioral activation, problem-solving, and mind-body interventions that help to address multiple psycho-socio-cultural stressors through revitalizing resources at the individual, family, and community levels.
- The proposed intervention will be delivered to participants in their family environment by interventionists from the same community they trust and understand their language and problems from their cultural lens.
- This study will be among the first to link a preventive intervention with both biomarkers of stress (hair cortisol) and perceived stress and, using longitudinal data, to examine change over time in stress.
- This study relies on self-report measures of anxiety and depressive symptoms though the clinical diagnosis is the gold standard. Such an approach is not feasible in community-based studies.

## Introduction

Refugees resettled in the United States are vulnerable to mental health problems,<sup>1, 2</sup> such as anxiety and depression due to stress resulting from integrating into a new culture.<sup>3-5</sup> Refugees' risk for mental health problems increases during their acculturative process due to exposure to multiple stressors, such as adjustment to a new culture with limited language and socio-cultural skills, perceived discrimination, and a lack of culturally mediated and protective social support resources.<sup>5, 6</sup> Although mental health treatments are available to help alleviate the intrapersonal, social, and economic costs of mental disorders, refugees greatly underutilize these services.<sup>1, 7, 8</sup> Thus, evidence-based, culturally tailored preventative mental health interventions are needed for the growing number of refugees in the United States.

Existing interventions are focused explicitly on treatment models to provide quality care for those with diagnosed mental health problems<sup>9</sup> that do little to help reduce stress and prevent mental disorders for those who have not yet developed diagnosable symptoms. For prevention, a culturally tailored intervention that addresses multiple psycho-socio-cultural stressors, including social and cultural integration, holds good promise.<sup>10, 11</sup> Community-based preventative interventions that promote positive impacts of social and cultural behaviors on mental health outcomes by protective resources are needed for the growing number of refugees dealing with life complexities.<sup>12, 13</sup> A review of community-based mental health interventions in refugees resettled to the United States suggests<sup>14</sup> that counseling, health promotion, and skill-building workshops facilitated by refugee peers<sup>15-17</sup> are helpful to reduce the psychological distress of many refugees who may be struggling with individual or family difficulties. Specifically, the Centers for Disease Control and Prevention (CDC) recommends using a non-clinical, community support approach to prevent mental illness among refugees resettled in the United States.<sup>18</sup>

1  
2  
3 Problem Management Plus (PMP) is a low-intensity evidence-based psychological  
4  
5 intervention developed by the World Health Organization (WHO) that trained laypeople can  
6  
7 deliver.<sup>19, 20</sup> PMP systematically teaches four strategies: stress management through mind-body  
8  
9 exercises,<sup>21-24</sup> problem-solving,<sup>25</sup> behavioral activation,<sup>26-33</sup> and skills to strengthen social  
10  
11 support for individuals with psychological distress. PMP has been proven successful in reducing  
12  
13 depression for women with mental disorders in Pakistan in a group setting.<sup>34</sup> We have adapted  
14  
15 PMP to develop our Problem Management Plus for Immigrants (PMP-I) following a successful  
16  
17 result of a pilot social and emotional wellbeing intervention. The pilot intervention included  
18  
19 psychoeducation, mind-body exercise, problem-solving, and social support and reduced more  
20  
21 than 50% prevalence of anxiety and depression from pre- to post-intervention among Bhutanese  
22  
23 refugees when delivered in either a group<sup>35</sup> or a family setting.<sup>36</sup> While promising, these pilot  
24  
25 results were drawn from only those receiving the treatment; no control group was available for  
26  
27 comparison. Thus, the present study is to apply the adapted PMP in a randomized controlled  
28  
29 trial. The present study is indicated for several reasons: our intervention model demands  
30  
31 integration of social and emotional stressors; promising results of PMP in a non-controlled pilot  
32  
33 study; the need to test the efficacy of PMP using the more rigorous randomized controlled trial  
34  
35 (RCT) study design; strong evidence of family and community ties in health care process; and  
36  
37 growing consensus among community, scientists, and policymakers on the need for family-based  
38  
39 care models that are sustainable.  
40  
41  
42  
43  
44  
45  
46  
47  
48

## 49 **Objectives and hypothesis**

50  
51 The main objective of this study is to pilot test the feasibility and acceptability of PMP-I among  
52  
53 Bhutanese adults 18 years or older living in Massachusetts with a score of 14 or below on the  
54  
55  
56  
57



1  
2  
3 Patient Health Questionnaire-9. Our central hypothesis is that PMP-I will reduce stress, anxiety,  
4 and depressive symptoms. We will test preliminary effects of PMP-I vs. community support  
5 services pamphlets in a randomized pilot trial (N=116 families; 58 families per intervention and  
6 control) on perceived stress,<sup>37</sup> anxiety and depressive symptoms (primary outcomes).<sup>38</sup> chronic  
7 physiological stress assessed in hair cortisol (secondary outcome), and self-efficacy,<sup>39</sup> coping,<sup>40</sup>  
8 family conflict resolution,<sup>41</sup> family satisfaction,<sup>42</sup> social support (targets),<sup>43</sup> and social networks<sup>44</sup>  
9 with assessments at baseline, post-, and 3-month post-intervention.  
10  
11  
12  
13  
14  
15  
16  
17  
18

## 19 20 21 **Methods**

### 22 **Design and setting**

23  
24 This study will be conducted among resettled Bhutanese adults living in Massachusetts. Since  
25 2008, Bhutanese people have been resettled in various US states and are one of the largest  
26 groups of South Asian refugees (about 90, 000).<sup>45</sup> They bear a high burden of mental health  
27 problems both in the nation (depression: 20%; suicide rate: 21.5 per 100,000)<sup>18</sup> and in western  
28 Massachusetts (depression: 23.8%; anxiety: 34.5%).<sup>46</sup> Given the importance of family  
29 relationships, communication, and coping in mental health,<sup>47</sup> the preventative social and  
30 emotional wellbeing intervention was designed for resettled Bhutanese adults in western  
31 Massachusetts using a community-based participatory research (CBPR) approach.<sup>35</sup>  
32  
33  
34  
35  
36  
37  
38  
39  
40  
41  
42  
43  
44  
45  
46

47 **Study design:** This mixed-methods study will incorporate a two-arm randomized controlled  
48 feasibility trial and qualitative evaluation of PMP-I intervention's acceptability to a range of  
49 stakeholders. The study protocol has been reported following the Standard Protocol Items:  
50  
51  
52  
53  
54  
55  
56  
57  
58  
59  
60

1  
2  
3 Recommendations for Interventional Trials (SPIRIT). **Figure 1** shows the study flowchart, and  
4  
5 **Figure 2** shows the SPIRIT figure.  
6  
7  
8  
9

## 10 **Participant recruitment**

### 11 *Participant inclusion criteria using a screening measure*

12  
13  
14 This study will include eligible parents and adult children aged 18 and above interested in  
15 participating as primary study participants. At baseline, we will use a screening tool to identify  
16 individuals without significant depressive symptoms, as we aim to evaluate the effect of our  
17 intervention to prevent depression rather than treat depression. Eligibility criteria for our primary  
18 study participants include Bhutanese adults 18 years or older (both parents and children of each  
19 family) resettled in Massachusetts with a score of 14 or below on the Patient Health  
20 Questionnaire (PHQ-9), a screening questionnaire for depression. Our statistical analysis will  
21 focus on data from primary study participants only with baseline PHQ-9 scores 14 or below.  
22  
23 However, all other interested adult family members, both parents and their adult children,  
24 regardless of PHQ-9 score, will be invited to participate in the intervention. The PHQ-9 scores of  
25 participants will not be disclosed to anyone to maintain individual confidentiality. Besides,  
26 individuals with PHQ-9 screening score '15-19' (moderately severe depression) and '20-27'  
27 (severe depression) will be provided with feedback on their screening questionnaire outcomes  
28 confidentially. They will be encouraged to consult their primary health care providers.  
29  
30  
31  
32  
33  
34  
35  
36  
37  
38  
39  
40  
41  
42  
43  
44  
45  
46  
47  
48

### 49 *Participant exclusion criteria*

50  
51 Participants with clinically diagnosed mental disorders and those taking psychiatric medications  
52 for any mental health problems will also be encouraged to participate in the family-based  
53  
54  
55  
56  
57  
58  
59  
60

1  
2  
3 intervention activities. However, in our primary statistical analysis, we will not consider data  
4  
5 from those participants with PHQ-9 scores of 15 or above or diagnosed with mental health  
6  
7 problems.  
8  
9

### 11 12 **Informed consent**

13  
14 The principal investigator (PI) has prepared an informed consent document including an  
15  
16 explanation on study background, screening, recruitment criteria, sample size, data collection,  
17  
18 and intervention, study risks and benefits, confidentiality, National Institute of Mental Health  
19  
20 Data Archive (NDA) data sharing policy, and hair samples collection procedure. Trained  
21  
22 community research assistants (RAs) will inform screening and study procedures to each  
23  
24 participant using UMass Amherst Institutional Review Board (IRB)-approved single informed  
25  
26 consent form visiting in-person. Once participants understand study details, RAs will request  
27  
28 their signature or initials or fingerprint for those who cannot write in the consent form before  
29  
30 data collection. Participants will be reminded that their participation in the study is voluntary and  
31  
32 free to leave the study without penalty.  
33  
34  
35  
36  
37  
38  
39

### 40 **Sample size and power calculations**

41  
42 The goal of the pilot project is to estimate the magnitude of the difference between the  
43  
44 preventive intervention and the education control on the primary outcomes of interest to inform  
45  
46 the design of a large-scale intervention. We conducted a power analysis to detect an effect size  
47  
48 (ES) as small as  $ES = .30$  with  $\alpha = .05$  and power of  $.80$ . We may find a larger effect in our  
49  
50 pilot, but our understanding is that power estimates should be based on the smallest effect we  
51  
52 want to detect rather than the size of the effect that we expect.<sup>48</sup> Analyses were performed using  
53  
54  
55  
56  
57  
58  
59  
60

1  
2  
3 Optimal Design<sup>49</sup> by accounting for the intra-correlation among family members of .10 and alpha  
4 = .05, we would have 80% power to detect a standardized difference of ES=.30 between two  
5  
6 treatment groups of 116 families (58 per treatment arm) with an equal probability of being  
7  
8 randomized to each of our two intervention arms.  
9  
10

### 11 12 13 14 15 **Randomization**

16  
17 We will randomly allocate selected families into intervention and control groups using a random  
18 sampling method after the baseline survey. RAs are not aware of which group the family will be  
19 randomized to when collecting baseline data. Using a random number table, we will randomly  
20 assign 116 interested families (58 families per intervention and control). For random allocation,  
21 first, the PI will prepare the sampling frame that lists interested families, then assign a number to  
22 each family in the sampling frame, and finally select 116 numbers using a table of random  
23 numbers. We will assign a random number selected at the first attempt for intervention and the  
24 second attempt for control.  
25  
26  
27  
28  
29  
30  
31  
32  
33  
34

35 Procedures are in place for tracking the participants for intervention and follow-up (e.g.,  
36 contact address and phone). RAs will visit selected families and brief them about study  
37 procedures, informed consent, and procedures to protect human subjects. Two adult members of  
38 selected families who meet the inclusion criteria and give informed consent will be recruited for  
39 the study. We will follow up with all families randomized to either study arm. We will not  
40 follow up with participants if they decide to end their participation at a particular time point of  
41 our study. But, we will include their already collected data in our analysis. Given our strong  
42 community networks and mobilization of community RAs, we anticipate low attrition rates in  
43 practice.  
44  
45  
46  
47  
48  
49  
50  
51  
52  
53  
54  
55  
56  
57  
58  
59  
60

## **Problem Management Plus for Immigrants (PMP-I)**

PMP-I is a 5-week, peer-led, culturally tailored mental health promotion program that includes psychoeducation, problem-solving, behavioral activation (90 minutes), breathing exercises, and yoga (90 minutes) in a family setting. PMP-I will use a structured approach, including once-a-week face-to-face sessions, yoga practice, breathing exercises, homework that includes practice activities, rebuilding individual skills, or learning new skills to reduce stress.

Our intervention aims to develop skills in coping adaptively in a new culture, seeking help and support for mental health problems, and other life skills opportunities that can improve their quality of life. **Module 1: Managing Stress** includes yoga, breathing exercise, stress-management sessions, and practice exercises to develop coping strategies that are most helpful to reduce stress and then plan a strategy to carry out those solutions. **Module 2: Managing Problems** includes practice exercises to identify the problems causing the most concern, develop solutions that are most helpful in addressing the problem, and then plan a strategy to carry out those solutions. **Module 3: Behavioral Activation** includes communication skill sessions and practice exercises to identify pleasant activities (time to yourself; connecting with others; self-care), breaking down the task into smaller steps, and schedule tasks, and then plan a strategy to carry out those tasks. **Module 4: Strengthening Social Support** includes social skills sessions and practice exercises to identify at least one person or service from whom the participant feels comfortable getting some support, and to plan exactly what the participant is going to do, and then schedule a day to carry out the tasks. **Module 5: Staying Well** includes practice exercises to make a plan that helps to create a supportive family environment.

1  
2  
3 Community interventionists (CIs) are trained community members with at least a high school  
4 level of education, and no formal training or prior experience with mental health will deliver the  
5 PMP-I. Dr. Christopher Martell, board-certified in cognitive and behavioral psychology and  
6 clinical psychology and a Massachusetts Licensed Psychologist, will provide 12 days of training  
7 to the interventionists in collaboration with the PI and Dr. Steven D. Hollon (Professor of  
8 Psychiatry, Psychology and Human Development) following the World Health Organization  
9 PMP Helpers' Training Guide<sup>50</sup> adapted for PMP-I. Classroom training includes information  
10 about stress, depression, mental health problems, the rationale for each intervention strategy,  
11 necessary helping skills, practice plan formulation, role-plays, peer observations, and group  
12 discussion related to core intervention concepts, practices, and supervision skills. Supervision  
13 involves discussing participants' progress and difficulties experienced when delivering strategies  
14 and role-playing on managing problems or practicing skills. They will use the PMP-I  
15 intervention manual to provide PMP-I to community members in family settings under field  
16 supervisors and PI's supervision. We will conduct a formal evaluation of the interventionists'  
17 readiness to implement/supervise the PMP-I intervention, such as using the manual, answering  
18 questions, managing time, using a fidelity checklist, practicing exercise, and role play to provide  
19 feedback as necessary.  
20  
21  
22  
23  
24  
25  
26  
27  
28  
29  
30  
31  
32  
33  
34  
35  
36  
37  
38  
39  
40  
41

42 A licensed yoga trainer will provide 4 hours of breathing exercises and 16 hours of yoga to  
43 CIs and field supervisors using a mind-body exercise training manual. Classroom training  
44 includes theoretical and practices to guide participants in mind-body exercises for attention to  
45 breath, body sensation, emotional awareness, and mental function on different postures of yoga  
46 practices such as *Pranayama* (3 poses) and *Asana* (21 poses). Training will include practice  
47  
48  
49  
50  
51  
52  
53  
54  
55  
56  
57  
58  
59  
60

1  
2  
3 assessment at the end to ensure that all field staff is trained, using a checklist, practice exercise,  
4 and role-plays.  
5  
6  
7  
8  
9

### 10 **Community Support Service Program**

11  
12 Bhutanese community members expressed that knowing the health and life skill development  
13 program available in their communities would benefit them in strengthening their life skills.<sup>51</sup> By  
14 considering their request, we have prepared pamphlets including names, contact, and service  
15 details of community and health organizations in the area where they live. CIs will distribute  
16 community support service program pamphlets to control families.  
17  
18  
19  
20  
21  
22  
23  
24  
25

### 26 **Primary outcome measures**

#### 27 **Anxiety and Depressive Symptoms**

28  
29 The Hopkins Symptom Checklist-25 (HSCL-25) will be used to measure anxiety, and depressive  
30 symptoms experienced over the past month.<sup>38</sup> It is composed of a 10-item subscale for anxiety  
31 and a 15-item subscale for depression, with each item scored on a Likert scale from 1 (not at all)  
32 to 4 (extremely). The scale has high internal consistency (Cronbach's  $\alpha$ ) for anxiety (0.95) and  
33 depression (0.94) in the Bhutanese study.<sup>35</sup>  
34  
35  
36  
37  
38  
39  
40  
41  
42  
43

#### 44 **Perceived Stress**

45  
46 The 10-item Cohen Perceived Stress Scale (PSS) will be used to assess perceived stress.<sup>37</sup> The  
47 PSS uses a 5-point Likert scale (ranging from 0, "never" to 4, "very often") to assess  
48 psychological stress experienced during the past month, including the extent to which situations  
49  
50  
51  
52  
53  
54  
55  
56  
57  
58  
59  
60

1  
2  
3 felt unpredictable, uncomfortable, and overwhelming. In the Bhutanese study, the scale has high  
4  
5 internal consistency (Cronbach's  $\alpha = 0.80$ ).<sup>35</sup>  
6  
7

## 10 **Secondary outcome measures**

### 12 **Physiological stress**

14 We will use the enzyme-linked immunosorbent assay (ELISA) cortisol hair test (average  
15 hormone levels over the past three months) as a biomarker to measure physiological stress. Hair  
16 samples will be processed in the neuroendocrine lab at the University of Massachusetts  
17 Amherst.<sup>52, 53</sup> Sensitive and specific enzyme immunoassay (Arbor Assays) will be used for the  
18 analysis. The assay has intra- and inter-assay coefficients of variation of <10%.  
19  
20  
21  
22  
23  
24  
25  
26  
27

### 28 **Other measures**

#### 30 **Coping strategy**

32 Coping strategy will be measured using a 32-item Coping Strategies Inventory-Short Form (CSI-  
33 SF).<sup>40</sup> The CSI-SF includes two overall coping factors, Engagement and Disengagement, and  
34 four secondary factors, Problem Engagement, Problem Disengagement, Emotion Engagement,  
35 and Emotion Disengagement. The CSI-SF scale (Cronbach's  $\alpha = 0.95$ ) has high internal  
36 consistencies in the Bhutanese study.<sup>35</sup> Participants were asked to rate their responses on a 5-  
37 point Likert-type scale ranging from *not at all (1)* to *very much (5)*.  
38  
39  
40  
41  
42  
43  
44  
45  
46  
47  
48

#### 49 **Coping Self-efficacy**

51 Self-efficacy will be measured using a 26-item Coping Self-efficacy (CSE) scale for coping with  
52 challenges and threats.<sup>39</sup> Each item of the scale will be rated on an 11-point scale Likert-type  
53  
54  
55  
56  
57



1  
2  
3 scale ranging from (0) cannot do at all, (5) moderately certain can do, and (10) certain can do.

4  
5 The scale has high internal consistency (Cronbach's  $\alpha = 0.96$ ) in the previous Bhutanese study.<sup>35</sup>

### 6 7 8 9 10 **Social support**

11  
12 Perceived social support will be measured using a 12-item Multidimensional Scale of Perceived  
13  
14 Social Support (MSPSS),<sup>43</sup> including support from friends, family, and significant others. A  
15  
16 sample item for this scale is, "My family tries to help me." Each item of the scale will be rated on  
17  
18 a 5-point Likert-type scale ranging from *strongly disagree (1)* to *strongly agree (5)*. Graded  
19  
20 items will be summed up to provide a total score, and higher scores indicate high social support.

21  
22 The scale has high internal consistency (Cronbach's  $\alpha = 0.92$ ) in the previous Bhutanese study.<sup>35</sup>

### 23 24 25 26 27 28 **Social network**

29  
30 We will use a Lubben Social Network Scale-Revised (LSNS-R) to measure social networks  
31  
32 among family and friendships.<sup>44</sup> It consists of six questions, which assess kinship ties, and a  
33  
34 comparable set of six questions, which determine friend ties by replacing the word relatives with  
35  
36 the word friends. We prepared three questions to measure cross-cultural social ties following a  
37  
38 similar pattern. The scale has high internal consistency for kinship ties (Cronbach's  $\alpha = 0.78$ ),  
39  
40 friendship ties (Cronbach's  $\alpha = 0.80$ ), and cross-cultural social ties (Cronbach's  $\alpha = 0.74$ ) in the  
41  
42 previous Bhutanese study.<sup>35</sup> These items will be scored on a five-point Likert scale ranging from  
43  
44 *none (0)* to *9 or more or always (5)*.

### 45 46 47 48 49 50 51 **Family conflict resolution**

1  
2  
3 Family conflict resolution, including positive or negative resolution, effective communication,  
4 and discussion of differences, will be measured using a 17-item version of the "Family Conflict  
5 Resolution" scale.<sup>41</sup> This scale has high internal consistency (Cronbach's  $\alpha = 0.90$ ) in the  
6 previous Bhutanese study.<sup>35</sup> Participants will be asked to respond on a 7-point Likert-type scale,  
7 ranging from *never (1)* to *always (7)*.  
8  
9

10  
11  
12  
13  
14  
15  
16  
17 **Family satisfaction:** Family satisfaction with various aspects of family functioning, including  
18 family closeness, flexibility, and communication, will be measured using a 10-item family  
19 satisfaction scale.<sup>54</sup> Participants will be asked to respond on a 5-point Likert-type scale, ranging  
20 from *very dissatisfied (1)* to *extremely satisfied (5)*.  
21  
22  
23  
24  
25  
26  
27

### 28 **Process evaluation**

29  
30  
31 The PMP trainer's training guidelines provide specific tools for evaluating and monitoring the  
32 intervention, which we use to monitor intervention delivery fidelity. These tools are PMP Quiz,  
33 PMP Helper's Supervision Form, PMP Helper Classroom-based Competency Assessment, PMP  
34 Helper In-field based Competency Assessment, PMP Trainer/Supervisor Competency  
35 Assessment, and Session-by-Session Checklists for PMP Helpers.<sup>50</sup> We have adapted these tools  
36 in the context of our program contents. Using these standard tools, we will evaluate session-by-  
37 session classroom and in-field based competencies of community interventionists and field  
38 supervisors and provide them feedback as needed using supervision forms, role-plays, group  
39 discussion, and training.  
40  
41  
42  
43  
44  
45  
46  
47  
48  
49  
50

51 At the field level, field supervisors will monitor intervention sessions delivered by  
52 community interventionists using standard checklists. Items include adherence to the manual,  
53  
54  
55  
56  
57

1  
2  
3 percent of intervention content administered, proper use of time/materials, and adequate response  
4  
5 to participants' questions. They will also monitor participants' engagement, acceptability, and  
6  
7 satisfaction via brief questionnaires with participants and interventionists during and after  
8  
9 intervention completion. Moreover, community interventionists will be asked to complete a  
10  
11 structured checklist on the attendance, compliance, and satisfaction towards intervention  
12  
13 components immediately after each session.  
14  
15

16  
17 The PI will conduct a focus group discussion (FGD) in the Nepali language with  
18  
19 interventionists, supervisors, and participants separately to collect information on barriers and  
20  
21 facilitators of intervention, perceptions about whether the intervention met participants' needs,  
22  
23 and feedback on how effectively the program team worked with participants. Interviews and  
24  
25 FGD will be documented verbatim in a written transcript for subsequent analysis. All qualitative  
26  
27 data will be analyzed using thematic content analysis.<sup>55</sup> Feedback provided by the field staff will  
28  
29 be reviewed and coded to identify recurrent themes regarding the intervention's acceptability.  
30  
31 Fidelity data will be used to assess intervention content and transmission.  
32  
33  
34  
35  
36

### 37 **Data management**

38  
39 All interviews will be conducted with the utmost privacy and confidentiality. Each interested and  
40  
41 eligible adult participant in the family will be interviewed individually, in a private place where  
42  
43 they feel comfortable, by our trained community RAs. The RAs will ensure audio and visual  
44  
45 privacy at these sites, and ensure data confidentiality. RAs will reassure participants that  
46  
47 numerical codes would be used in place of names in all records to ensure confidentiality. The  
48  
49 survey materials (questionnaires, transcriptions, and field notes) will be stored in a locked  
50  
51 cabinet in the PI's office. Data entry will be done on the PI's office computer (encrypted and  
52  
53 password protected) under the full supervision of the PI. The original data will be kept on  
54  
55  
56  
57  
58  
59  
60

1  
2  
3 OneDrive, a secure, networked university data storage system. De-identified data sets will be  
4  
5 used for statistical analyses. The PI herself will do data analysis and documentation. All  
6  
7 information will be presented in aggregate form in the manuscript or conference abstract, and no  
8  
9 individual respondent will be identified.  
10  
11  
12  
13

### 14 **Data analysis**

15  
16 We will compare baseline characteristics of intervention and control groups using chi-square and  
17  
18 t-tests as appropriate. While differences between groups are not expected because of the  
19  
20 randomization used in the study design, variables showing significant differences between the  
21  
22 two groups will be included as covariates in primary analyses. The primary analyses will test  
23  
24 whether participants' outcomes in the PMP-I arm differ from those in the control arm. Multilevel  
25  
26 modeling will compare outcomes of each treatment arm while accounting for the clustering of  
27  
28 participants within families. Continuous outcomes will be analyzed using hierarchical linear  
29  
30 modeling, and dichotomous outcomes will be analyzed using multilevel generalized linear  
31  
32 models with a Bernoulli distribution appropriate to nonlinear binary outcomes.<sup>56</sup>  
33  
34  
35  
36  
37

38 We expect approximately 2 to 4 members for each of the 58 families in each treatment arm,  
39  
40 and the correlation among family members' responses will be accounted for in the model.

41  
42 Hierarchical or multilevel modeling is suited to these data as it accounts for the clustering of  
43  
44 members within families and unbalanced designs (i.e., different family sizes).<sup>56</sup> This will be an  
45  
46 intention-to-treat type of analysis, as multilevel modeling allows retention of all participants  
47  
48 irrespective of the number of sessions attended (multilevel modeling uses maximum likelihood  
49  
50 estimation, one of the recommended ways of handling missing data). The analysis will estimate  
51  
52 endpoint outcomes based on repeated measures (Level 1) within individuals (Level 2) within  
53  
54  
55  
56  
57

1  
2  
3 families (Level 3). Separate models will be created to evaluate the relationships between  
4  
5 mediators (targets) and outcomes and explore mediators (e.g., coping) of intervention-outcome  
6  
7 relation. All analyses will be performed using SAS, version 9 (SAS Institute Inc, Cary, NC).  
8  
9  
10

### 11 12 **Independent Safety Monitor**

13  
14 We will select an Independent Safety Monitor (ISM) with mental health expertise, whose  
15  
16 primary responsibility is to provide independent monitoring of this clinical trial in a timely  
17  
18 fashion. Overall, the ISM will review enrollment data, safety data, and data integrity to maintain  
19  
20 safety in the trial. The PI will submit data reports once a year to the ISM. The report will include  
21  
22 the key variables necessary for monitoring the safety and quality of data collection and the  
23  
24 integrity of the study, including inclusion criteria, informed consent, subject enrollment and  
25  
26 retention, data confidentiality, intervention compliance, drop outs, adverse events, protocol  
27  
28 compliance, data quality, and baseline characteristics of study participants. The ISM will have  
29  
30 access to all safety and data quality information collected and will have the authority to stop the  
31  
32 study if it is determined that there are unacceptable risks to participants. The ISM also will  
33  
34 review the study protocol, informed consent, and all relevant documents before the onset of the  
35  
36 study, and will review and approve amendments to these documents. The ISM will issue a  
37  
38 monitoring report to the PI following each review. The PI will submit all review reports to the  
39  
40 UMass Amherst IRB and NIMH Program Officer in annual progress reports.  
41  
42  
43  
44  
45  
46  
47  
48

### 49 **Trial management**

50  
51 The PI will assume overall responsibility of trial management working together with the entire  
52  
53 research team throughout the project, meeting monthly with Co-Investigators (psychiatrist,  
54  
55  
56  
57

1  
2  
3 cognitive behavior therapist and epidemiologist) and once every week with field staff  
4  
5 (supervisors, interventionists, and research assistants) via in-person or zoom or text message as  
6  
7 needed. During the trial, experienced field supervisors from the Bhutanese community, who are  
8  
9 trained as a community health worker and have worked with the PI in previous family-based  
10  
11 mental health intervention studies with depressive and suicidal ideation outcomes, will take  
12  
13 responsibility for the day-to-day oversight of the participants and field teams in the  
14  
15 implementation of the trial. Field supervisors will immediately report any noted adverse events  
16  
17 among participants to the PI. The PI will report adverse events data to the Independent Safety  
18  
19 Monitor (ISM), UMass Amherst IRB, and National Institute of Mental Health (NIMH) Program  
20  
21 Officer following NIMH guidelines for reportable events, as described below.  
22  
23  
24  
25  
26  
27

### 28 **Adverse events reporting**

29  
30 Throughout the study period, all study participants will be monitored daily by the field  
31  
32 supervisors under the PI's supervision. Field supervisors will request study participants and their  
33  
34 family members to immediately report any unanticipated serious adverse events in their family,  
35  
36 such as 1) reporting suicidal ideation or attempts, hospitalization, disability, and/or death; 2)  
37  
38 discomfort with the PMP-I program content and/or evaluation procedures, and 3) risk of a breach  
39  
40 of confidentiality, of the collected data and/or by program personnel to field supervisor or PI  
41  
42 directly. Field supervisors will immediately report details of such adverse events to PI. The PI  
43  
44 will be responsible for reporting them to the UMass Amherst IRB, ISM, and NIMH Program  
45  
46 Officer by secure email within ten business days of the study team becoming aware of any  
47  
48 serious adverse events. The PI will be responsible for summarizing all adverse events that are  
49  
50  
51  
52  
53  
54  
55  
56  
57  
58  
59  
60

1  
2  
3 deemed expected and/or unrelated to the study in the annual progress report submitted to the  
4  
5 UMass Amherst IRB, ISM, and NIMH Program Officer by secure email.  
6  
7  
8  
9

## 10 **Discussion**

11  
12 This study reports an RCT protocol that tests PMP-I's feasibility, acceptability, and preliminary  
13  
14 outcomes with trained community facilitators. This study is built on prior research that has  
15  
16 shown the effectiveness of social and emotional wellbeing intervention, including  
17  
18 psychoeducation, problem-solving, social support, and mind-body exercises, to reduce stress,  
19  
20 anxiety, and depressive symptoms among Bhutanese adults resettled in MA at a group<sup>35</sup> and  
21  
22 family settings<sup>36</sup> using a pre-and post-test intervention design. Our project designed for  
23  
24 Bhutanese immigrants includes evidence-based interventions of specific relevance to this  
25  
26 community, such as psychoeducation,<sup>57</sup> problem solving,<sup>25</sup> behavioral activation,<sup>26-33</sup> mind-body  
27  
28 exercises,<sup>21-24</sup> and strengthening social support to address identified social (e.g., social isolation,  
29  
30 language difficulties) and emotional (e.g., lack of self-esteem or self-efficacy)<sup>51</sup> stressors by  
31  
32 strengthening protective factors (e.g., resilience or coping).<sup>58, 59</sup> This study is innovative as it will  
33  
34 be the first culturally tailored, preventive, family-based, multi-component behavioral  
35  
36 intervention driven by the community to reduce stress. We will have pilot-tested a preventative  
37  
38 mental health intervention for Bhutanese adults upon completion. This study can be expected to  
39  
40 impact reducing stress and promoting immigrants' mental wellbeing.  
41  
42  
43  
44  
45

46  
47 Our project is likely to be replicated with other immigrant communities with minimal  
48  
49 adaptation over the long term for three reasons. First, our intervention is guided by a strengths-  
50  
51 based approach in which we plan to include community strengths. This principle can be applied  
52  
53 to capture and integrate the strengths of any community. Second, our program prioritizes the  
54  
55  
56  
57  
58  
59  
60

1  
2  
3 training of community members as interventionists, as these are individuals whom the  
4  
5 community trusts, who share the same cultural lens as the community and thus can well  
6  
7 understand language and specific challenges, and who have a vested interest in the strength and  
8  
9 resilience of their community. This aspect of our intervention design is easily adaptable to other  
10  
11 populations. Finally, intervention is designed to be delivered in family settings where  
12  
13 participants are most comfortable, and family members can support each other throughout their  
14  
15 lives. This component is crucial in collectivistic societies where family bonds and group identity  
16  
17 are strong. Thus, our family-based strategies could be replicable in other immigrant groups,  
18  
19 where there are similarities in social and emotional stressors, challenges, community strengths  
20  
21 (coping, resilience, social support), strong family support, and cultural preference of native  
22  
23 community counselors for their mental health consultation. Our strength-based and peer-led  
24  
25 strategies promote community engagement and make the intervention sustainable.<sup>60-62</sup>  
26  
27  
28  
29  
30  
31  
32

### 33 **Patient and public involvement**

34  
35 Patients or the public were not involved in the design, or conduct, or reporting, or dissemination  
36  
37 plans of our research.  
38  
39  
40  
41

### 42 **Trial status**

43  
44 At the time of manuscript submission, trial was ongoing. Results of this study are expected in  
45  
46 mid 2024.  
47  
48  
49  
50  
51  
52  
53  
54  
55  
56  
57



### List of abbreviations

CBPR: Community-Based Participatory Research; CDC: Centers for Disease Control and Prevention; CIs: Community Interventionists; CSE: Coping Self-efficacy; CSI-SF: Coping Strategies Inventory-Short Form; ELISA: Enzyme-Linked Immunosorbent Assay; ES: Effect Size; FGD: Focus Group Discussion; HSCL-25: Hopkins Symptom Checklist-25; IRB: Institutional Review Board; ISM: Independent Safety Monitor; LSNS-R: Lubben Social Network Scale-Revised; MSPSS: Multidimensional Scale of Perceived Social Support; NDA: National Institute of Mental Health Data Archive; NIMH: National Institute of Mental Health; PHQ-9: Patient Health Questionnaire; PI: Principal Investigator; PMP: Problem Management Plus; PMP-I: Problem Management Plus for Immigrants; PSS: Perceived Stress Scale; RAs: Research Assistants; RCT: Randomized Controlled Trial; SPIRIT: Standard Protocol Items: Recommendations for Interventional Trials; WHO: World Health Organization

## Declarations

## Ethics and dissemination

The Institutional Review Board of the University of Massachusetts Amherst approved this study and certified that it was performed according to the ethical standards laid down in the 1964 Declaration of Helsinki and its later amendments. All participants enroll in the study will provide written informed consent. The results of this study will be disseminated through peer-reviewed scientific journals and conferences.

## Consent for publication

Not applicable

## Availability of data and materials

At the time of manuscript submission, trial was ongoing. Results of this study are expected mid 2024. The PI will have access to the final data trial set.

## Competing interests

The author(s) declared no potential conflicts of interest with respect to the research, authorship, and/or publication of this article.

## Funding

This trial is funded by the National Institute of Mental Health of the National Institutes of Health under Award Number R34MH118396 (PI: Dr. Kalpana Poudel-Tandukar). The content is solely

1  
2  
3 the authors' responsibility and does not necessarily represent the official views of the National  
4  
5 Institutes of Health.  
6  
7  
8  
9

### 10 **Authors' contributions**

11  
12 KPT conceived the study and drafted the study and trial protocols. All authors were involved in  
13  
14 the design of the study; KPT, CSJ, CM, KCP, SR, RR, HL, JSM, ERBJ, and SDH were involved  
15  
16 in revising the study protocol for ethics review, and all authors were involved in commenting on  
17  
18 and revising the trial protocol. All authors read and approved the final manuscript.  
19  
20  
21  
22  
23

### 24 **Acknowledgments**

25  
26 Not applicable  
27  
28  
29  
30

### 31 **Authors' information**

32  
33 <sup>1</sup>Elaine Marieb College of Nursing, University of Massachusetts Amherst, MA, USA

34  
35 <sup>2</sup>Department of Psychological and Brain Sciences, College of Natural Sciences, University of  
36  
37 Massachusetts Amherst, MA, USA

38  
39 <sup>3</sup> Department of Health Promotion and Policy, School of Public Health and Health Sciences,  
40  
41 University of Massachusetts Amherst, MA, USA

42  
43 <sup>4</sup>Bhutanese Christian Society of Western Massachusetts, Springfield, MA, USA

44  
45 <sup>5</sup>Department of Biostatistics and Epidemiology, School of Public Health and Health Sciences,  
46  
47 University of Massachusetts Amherst, MA, USA

48  
49 <sup>6</sup>Department of Psychology, Vanderbilt University, Nashville, TN, USA  
50  
51  
52  
53  
54  
55  
56  
57  
58  
59  
60

## References

1. Taylor EM, Yanni EA, Pezzi C, Guterbock M, Rothney E, Harton E, Montour J, Elias C, Burke H. Physical and mental health status of Iraqi refugees resettled in the United States. *J Immigr Minor Health* 2014;16:1130-7.
2. Wagner J, Burke G, Kuoch T, Scully M, Armeli S, Rajan TV. Trauma, healthcare access, and health outcomes among Southeast Asian refugees in Connecticut. *J Immigr Minor Health* 2013;15:1065-72.
3. Alemi Q, Stempel C. Discrimination and distress among Afghan refugees in northern California: The moderating role of pre- and post-migration factors. *PLoS One* 2018;13:e0196822.
4. Ellis BH, Lankau EW, Ao T, Benson MA, Miller AB, Shetty S, Lopes Cardozo B, Geltman PL, Cochran J. Understanding Bhutanese refugee suicide through the interpersonal-psychological theory of suicidal behavior. *Am J Orthopsychiatry* 2015;85:43-55.
5. Vonnahme LA, Lankau EW, Ao T, Shetty S, Cardozo BL. Factors Associated with Symptoms of Depression Among Bhutanese Refugees in the United States. *J Immigr Minor Health* 2015;17:1705-14.
6. Williams ME, Thompson SC. The use of community-based interventions in reducing morbidity from the psychological impact of conflict-related trauma among refugee populations: a systematic review of the literature. *J Immigr Minor Health* 2011;13:780-94.
7. Ellis BH, Lincoln AK, Charney ME, Ford-Paz R, Benson M, Strunin L. Mental health service utilization of Somali adolescents: religion, community, and school as gateways to healing. *Transcult Psychiatry* 2010;47:789-811.

- 1  
2  
3 8. Colucci E, Szware J, Minas H, Paxton G, Guerra C. The utilization of mental health  
4 services by children and young people from a refugee background: A systematic literature  
5 review. *International Journal of Culture and Mental Health* 2012;7:86-108.  
6  
7
- 8  
9  
10 9. Swinson Evans T, Berkman N, Brown C, Gaynes B, Palmieri Weber R. Disparities  
11 within serious mental illness. Technical Brief No. 25. (Prepared by the RTI International–  
12 University of North Carolina Evidence-based Practice Center under Contract No. 290-2015-  
13 00011-I). AHRQ Publication No.16-EHC027-EF. Rockville, MD: Agency for Healthcare  
14 Research and Quality; May 2016. , 2016.  
15  
16
- 17 10. Goodkind JR, Hess JM, Isakson B, LaNoue M, Githinji A, Roche N, Vadnais K, Parker  
18 DP. Reducing refugee mental health disparities: a community-based intervention to address  
19 postmigration stressors with African adults. *Psychol Serv* 2014;11:333-46.  
20  
21
- 22 11. Weine SM. Developing preventive mental health interventions for refugee families in  
23 resettlement. *Fam Process* 2011;50:410-30.  
24  
25
- 26 12. Kirmayer LJ, Narasiah L, Munoz M, Rashid M, Ryder AG, Guzder J, Hassan G,  
27 Rousseau C, Pottie K. Common mental health problems in immigrants and refugees: general  
28 approach in primary care. *CMAJ* 2011;183:E959-67.  
29  
30
- 31 13. Pumariega AJ, Rothe E, Pumariega JB. Mental health of immigrants and refugees.  
32 *Community Ment Health J* 2005;41:581-97.  
33  
34
- 35 14. Peterson C, Poudel-Tandukar K, Sanger K, Jacelon CS. Improving Mental Health in  
36 Refugee Populations: A Review of Intervention Studies Conducted in the United States. *Issues*  
37 *Ment Health Nurs* 2020;41:271-82.  
38  
39  
40  
41  
42  
43  
44  
45  
46  
47  
48  
49  
50  
51  
52  
53  
54  
55  
56  
57  
58  
59  
60

- 1  
2  
3 15. Im H, Rosenberg R. Building Social Capital Through a Peer-Led Community Health  
4 Workshop: A Pilot with the Bhutanese Refugee Community. *J Community Health* 2016;41:509-  
5  
6  
7  
8 17.  
9  
10 16. Birman D, Beehler S, Harris EM, Everson ML, Batia K, Liautaud J, Frazier S, Atkins M,  
11 Blanton S, Buwalda J, Fogg L, Cappella E. International Family, Adult, and Child Enhancement  
12 Services (FACES): a community-based comprehensive services model for refugee children in  
13  
14  
15  
16  
17  
18  
19 17. Boehnlein JK, Kinzie JD, Sekiya U, Riley C, Pou K, Rosborough B. A ten-year treatment  
20  
21  
22  
23  
24 18. CDC. Suicide and suicidal ideation among Bhutanese refugees--United States, 2009-  
25  
26  
27  
28 2012. *MMWR Morb Mortal Wkly Rep* 2013;62:533-6.  
29  
30 19. Dawson KS, Bryant RA, Harper M, Kuowei Tay A, Rahman A, Schafer A, van  
31  
32  
33  
34  
35  
36 20. World Health Organization. Problem Management Plus (PM+): Individual psychological  
37  
38  
39  
40  
41  
42  
43  
44  
45  
46  
47 22. Falsafi N. A Randomized Controlled Trial of Mindfulness Versus Yoga: Effects on  
48  
49  
50  
51  
52  
53  
54  
55  
56  
57  
58  
59  
60

- 1  
2  
3 23. Prathikanti S, Rivera R, Cochran A, Tungol JG, Fayazmanesh N, Weinmann E. Treating  
4 major depression with yoga: A prospective, randomized, controlled pilot trial. PLoS One  
5  
6 2017;12:e0173869.  
7
- 8  
9  
10 24. de Manincor M, Bensoussan A, Smith C, Fahey P, Bouchier S. Establishing key  
11 components of yoga interventions for reducing depression and anxiety, and improving well-  
12 being: a Delphi method study. BMC Complement Altern Med 2015;15:85.  
13
- 14  
15 25. Cuijpers P, de Wit L, Kleiboer A, Karyotaki E, Ebert DD. Problem-solving therapy for  
16 adult depression: An updated meta-analysis. Eur Psychiatry 2018;48:27-37.  
17
- 18  
19 26. Martell CR, Dimidjian S, Hermann-Dunn R. Behavioral activation for depression: a  
20 clinician's guide. Guilford New York, NY.; 2010.  
21
- 22  
23 27. Mazzucchelli T, R. K, Rees C. Behavioral activation treatments for depression in adults:  
24 a meta-analysis and review. . Clin Psychol Sci Pract 2009;16:383-411.  
25
- 26  
27 28. Kanter JW, Manos RC, Bowe WM, Baruch DE, Busch AM, Rusch LC. What is  
28 behavioral activation? A review of the empirical literature. Clin Psychol Rev 2010;30:608-20.  
29
- 30  
31 29. Cuijpers P, van Straten A, Warmerdam L. Behavioral activation treatments of depression:  
32 a meta-analysis. Clin Psychol Rev 2007;27:318-26.  
33
- 34  
35 30. Cuijpers P, van Straten A, Warmerdam L. Problem solving therapies for depression: a  
36 meta-analysis. Eur Psychiatry 2007;22:9-15.  
37
- 38  
39 31. Kanter JW, Bush AM, Rusch LC. Behavioural activation: the CBT distinctive feature  
40 series. New York: Routledge.; 2009.  
41
- 42  
43 32. Veale D. Behavioural activation for depression. Adv Psychiatr Treat 2008;14:29-36.  
44
- 45  
46 33. Chowdhary N, Anand A, Dimidjian S, Shinde S, Weobong B, Balaji M, Hollon SD,  
47 Rahman A, Wilson GT, Verdelli H, Araya R, King M, Jordans MJ, Fairburn C, Kirkwood B,  
48  
49  
50  
51  
52  
53  
54  
55  
56  
57

1  
2  
3 Patel V. The Healthy Activity Program lay counsellor delivered treatment for severe depression  
4 in India: systematic development and randomised evaluation. *Br J Psychiatry* 2015;208:381-8.

5  
6  
7  
8 34. Khan MN, Hamdani SU, Chiumento A, Dawson K, Bryant RA, Sijbrandij M, Nazir H,  
9 Akhtar P, Masood A, Wang D, Wang E, Uddin I, Ommeren MV, Rahman A. Evaluating  
10 feasibility and acceptability of a group WHO trans-diagnostic intervention for women with  
11 common mental disorders in rural Pakistan: a cluster randomised controlled feasibility trial.  
12 *Epidemiol Psychiatr Sci* 2017;1-11.

13  
14  
15  
16  
17  
18  
19 35. Poudel-Tandukar K, Jacelon CS, Rai S, Ramdam P, Bertone-Johnson ER, Hollon SD.  
20 Social and Emotional Wellbeing (SEW) Intervention for Mental Health Promotion Among  
21 Resettled Bhutanese Adults in Massachusetts. *Community Ment Health J* 2021;57:1318-27.

22  
23  
24  
25  
26  
27  
28 36. Poudel-Tandukar K, Jacelon CS, Poudel KC, Bertone-Johnson ER, Rai S, Ramdam P,  
29 Hollon SD. Mental health promotion among resettled Bhutanese adults in Massachusetts: Results  
30 of a peer-led family-centred Social and Emotional Well-being (SEW) intervention study. *Health  
31 Soc Care Community* 2021.

32  
33  
34  
35  
36  
37  
38 37. Cohen S, Kamarck T, Mermelstein R. A global measure of perceived stress. *J Health Soc  
39 Behav* 1983;24:385-96.

40  
41  
42  
43  
44 38. Derogatis LR, Lipman RS, Rickels K, Uhlenhuth EH, Covi L. The Hopkins Symptom  
45 Checklist (HSCL): a self-report symptom inventory. *Behav Sci* 1974;19:1-15.

46  
47  
48  
49 39. Chesney MA, Neilands TB, Chambers DB, Taylor JM, Folkman S. A validity and  
50 reliability study of the coping self-efficacy scale. *Br J Health Psychol* 2006;11:421-37.

51  
52  
53  
54  
55 40. Tobin DL. Coping strategies therapy for bulimia nervosa. Washington, DC: American  
56 Psychological Association Press, 2000., 2000.



- 1  
2  
3 41. Roskos PT, Handal PJ, Ubinger ME. Family Conflict Resolution: Its Measurement and  
4 Relationship with Family Conflict and Psychological Adjustment. *Psychology* 2010;1:370-76.  
5  
6  
7 42. Olson DH. Family Satisfaction Scale. Minneapolis, MN: Life Innovations, Inc.; 2010.  
8  
9  
10 43. Zimet GD, Dahlem NW, Zimet SG, Farley GK. The multidimensional scale of perceived  
11 social support. *Journal of Personality Assessment* 1988;52:30-41.  
12  
13  
14 44. Lubben J, Blozik E, Gillmann G, Iliffe S, von Renteln Kruse W, Beck JC, Stuck AE.  
15 Performance of an abbreviated version of the Lubben Social Network Scale among three  
16 European community-dwelling older adult populations. *Gerontologist* 2006;46:503-13.  
17  
18  
19 45. United States Embassy Kathmandu. U.S. Ambassador Bids Farewell to 90,000th Refugee  
20 to Resettle to the United States. 21 September, 2016. Accessed July 24, 2017 From:  
21  
22 <https://np.usembassy.gov/u-s-ambassador-bids-farewell-90000th-refugee-resettle-united-states/>  
23  
24  
25  
26  
27  
28  
29  
30  
31 2016.  
32  
33 46. Poudel-Tandukar K, Bertone-Johnson ER, KC P, Poudel KC. Family-engaged  
34 preventative behavioral interventions are needed to promote mental health among HIV-infected  
35 individuals living in resource-poor settings. American Public Health Association Annual  
36 Meeting and Exposition (APHA), Philadelphia, USA. November 2-6, 2019. (Abstract Number:  
37 438575): Oral Presentation. 2019.  
38  
39  
40  
41  
42  
43  
44 47. Slobodin O, de Jong JT. Family interventions in traumatized immigrants and refugees: A  
45 systematic review. *Transcult Psychiatry* 2015;52:723-42.  
46  
47  
48  
49 48. Kraemer HC, Mintz J, Noda A, Tinklenberg J, Yesavage JA. Caution regarding the use of  
50 pilot studies to guide power calculations for study proposals. *Arch Gen Psychiatry* 2006;63:484-  
51  
52  
53  
54 9.  
55  
56  
57  
58  
59  
60

- 1  
2  
3 49. Raudenbush, S. W., et al. (2011). Optimal Design Software for Multi-level and  
4  
5 Longitudinal Research (Version 3.01) [Software]. Available from [www.wtgrantfoundation.org](http://www.wtgrantfoundation.org).  
6  
7  
8 50. World Health Organization. Problem Management Plus (PM+) Training Guide for PM+  
9  
10 Helpers: To accompany the PM+ intervention manual: Problem Management Plus: Individual  
11  
12 psychological help for adults impaired by distress in communities exposed to adversity –Field  
13  
14 Version 1.0 WHO (2016). Series on Low-Intensity Psychological Interventions – 2. Geneva,  
15  
16 WHO, 2018. .  
17  
18  
19 51. Poudel-Tandukar K, Jacelon CS, Chandler GE, Gautam B, Palmer PH. Sociocultural  
20  
21 Perceptions and Enablers to Seeking Mental Health Support Among Bhutanese Refugees in  
22  
23 Western Massachusetts. *Int Q Community Health Educ* 2019;39:135-45.  
24  
25  
26 52. Meyer J, Novak M, Hamel A, Rosenberg K. Extraction and analysis of cortisol from  
27  
28 human and monkey hair. *J Vis Exp* 2014:e50882.  
29  
30  
31 53. Meyer JS, Novak MA. Minireview: Hair cortisol: a novel biomarker of hypothalamic-  
32  
33 pituitary-adrenocortical activity. *Endocrinology* 2012;153:4120-7.  
34  
35  
36 54. Olson DH, Wilson M. Family Satisfaction. In Olson, D.H., and colleagues. *Families:  
37  
38 What Makes Them Work*. Newbury Park, CA: Sage Publishing.; 1982, 1989.  
39  
40  
41 55. Green J, Thorogood N. *Qualitative methods for health research*. Thousand Oaks, CA,  
42  
43 USA: SAGE Publishing; 2014. 2014.  
44  
45 56. Raudenbush S, W., Bryk. AS. *Hierarchical Linear Models: Applications and Data  
46  
47 Analysis Methods*. 2nd ed. Thousand Oaks: Sage Publications. 2002.  
48  
49  
50 57. Zlotnick C, Johnson SL, Miller IW, Pearlstein T, Howard M. Postpartum depression in  
51  
52 women receiving public assistance: pilot study of an interpersonal-therapy-oriented group  
53  
54 intervention. *Am J Psychiatry* 2001;158:638-40.  
55  
56  
57  
58  
59  
60

- 1  
2  
3 58. Poudel-Tandukar K, Jacelon CS, Bertone-Johnson ER, Gautam B, Palmer PH, Hollon  
4 SD. Coping strategies and stress among resettled Bhutanese adults in Massachusetts. *Am J*  
5  
6 *Orthopsychiatry* 2020;90:502-09.  
7  
8  
9  
10 59. Poudel-Tandukar K, Chandler GE, Jacelon CS, Gautam B, Bertone-Johnson ER, Hollon  
11  
12 SD. Resilience and anxiety or depression among resettled Bhutanese adults in the United States.  
13  
14 *Int J Soc Psychiatry* 2019:20764019862312.  
15  
16  
17 60. Singla DR, Kohrt BA, Murray LK, Anand A, Chorpita BF, Patel V. Psychological  
18  
19 *Treatments for the World: Lessons from Low- and Middle-Income Countries. Annu Rev Clin*  
20  
21 *Psychol* 2017;13:149-81.  
22  
23  
24 61. Webel AR, Okonsky J, Trompeta J, Holzemer WL. A systematic review of the  
25  
26 *effectiveness of peer-based interventions on health-related behaviors in adults. Am J Public*  
27  
28 *Health* 2010;100:247-53.  
29  
30  
31 62. Petosa R, Smith LH. Peer mentoring for health behaviors change: A systematic review. .  
32  
33 *American Journal of Health Education* 2014;45:351-57.  
34  
35  
36  
37  
38  
39  
40  
41  
42  
43  
44  
45  
46  
47  
48  
49  
50  
51  
52  
53  
54  
55  
56  
57  
58  
59  
60

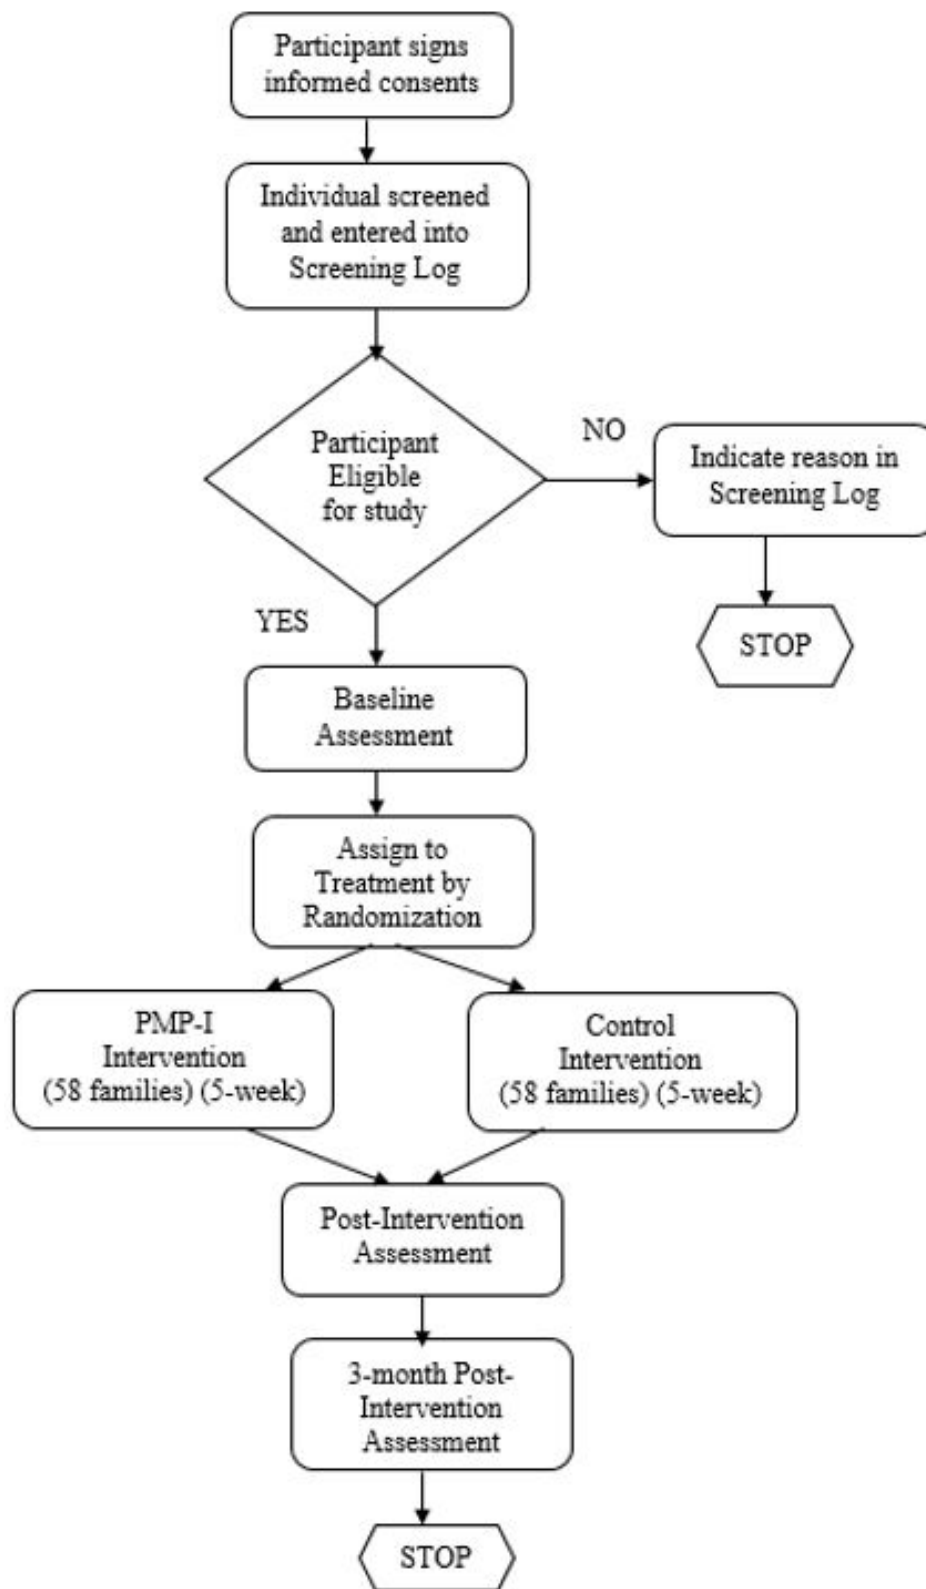

Figure 1 Flowchart of the study

| <i>Assessment</i>                                                  | <i>Screening Visit 1</i> | <i>Baseline, Enrollment Randomization: Visit 1</i> | <i>Intervention Session 1 Visit 2</i> | <i>Intervention Session 2 Visit 3</i> | <i>Intervention Session 3 Visit 4</i> | <i>Intervention Session 4 Visit 5</i> | <i>Intervention Session 5 Visit 6</i> | <i>Post-intervention Visit 7</i> | <i>3-month Follow-up Final Visit</i> |
|--------------------------------------------------------------------|--------------------------|----------------------------------------------------|---------------------------------------|---------------------------------------|---------------------------------------|---------------------------------------|---------------------------------------|----------------------------------|--------------------------------------|
| <i>Informed Consent Form</i>                                       | <i>X</i>                 |                                                    |                                       |                                       |                                       |                                       |                                       |                                  |                                      |
| <i>Screening tool</i>                                              | <i>X</i>                 |                                                    |                                       |                                       |                                       |                                       |                                       |                                  |                                      |
| <i>Inclusion/Exclusion Criteria</i>                                | <i>X</i>                 |                                                    |                                       |                                       |                                       |                                       |                                       |                                  |                                      |
| <i>Demographics</i>                                                |                          | <i>X</i>                                           |                                       |                                       |                                       |                                       |                                       | <i>X</i>                         | <i>X</i>                             |
| <i>Blood pressure</i>                                              |                          | <i>X</i>                                           |                                       |                                       |                                       |                                       |                                       | <i>X</i>                         | <i>X</i>                             |
| <i>Bodyweight &amp; height</i>                                     |                          | <i>X</i>                                           |                                       |                                       |                                       |                                       |                                       | <i>X</i>                         | <i>X</i>                             |
| <i>Waist circumference</i>                                         |                          | <i>X</i>                                           |                                       |                                       |                                       |                                       |                                       | <i>X</i>                         | <i>X</i>                             |
| <i>Hair samples</i>                                                |                          | <i>X</i>                                           |                                       |                                       |                                       |                                       |                                       |                                  | <i>X</i>                             |
| <i>Stress, Anxiety &amp; Depression</i>                            |                          | <i>X</i>                                           |                                       |                                       |                                       |                                       |                                       | <i>X</i>                         | <i>X</i>                             |
| <i>Family &amp; Social Support</i>                                 |                          | <i>X</i>                                           |                                       |                                       |                                       |                                       |                                       | <i>X</i>                         | <i>X</i>                             |
| <i>Coping Strategies</i>                                           |                          | <i>X</i>                                           |                                       |                                       |                                       |                                       |                                       | <i>X</i>                         | <i>X</i>                             |
| <i>Self-efficacy</i>                                               |                          | <i>X</i>                                           |                                       |                                       |                                       |                                       |                                       | <i>X</i>                         | <i>X</i>                             |
| <i>Family Conflict Resolution</i>                                  |                          | <i>X</i>                                           |                                       |                                       |                                       |                                       |                                       | <i>X</i>                         | <i>X</i>                             |
| <i>Family Satisfaction</i>                                         |                          | <i>X</i>                                           |                                       |                                       |                                       |                                       |                                       |                                  |                                      |
| <i>Enrollment/Randomization</i>                                    |                          | <i>X</i>                                           |                                       |                                       |                                       |                                       |                                       |                                  |                                      |
| <i>Intervention Session and its assessment using fidelity form</i> |                          |                                                    | <i>X</i>                              | <i>X</i>                              | <i>X</i>                              | <i>X</i>                              | <i>X</i>                              |                                  |                                      |
| <i>Adverse Events</i>                                              |                          | <i>X</i>                                           | <i>X</i>                              | <i>X</i>                              | <i>X</i>                              | <i>X</i>                              | <i>X</i>                              | <i>X</i>                         | <i>X</i>                             |

Figure 2 Overview of the study measure

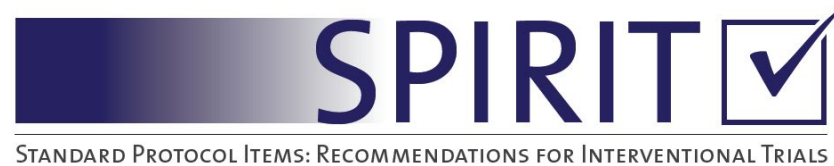

SPIRIT 2013 Checklist: Recommended items to address in a clinical trial protocol and related documents\*

| Section/item                      | Item No | Description                                                                                                                                                                                                                                                                              | Addressed on page number |
|-----------------------------------|---------|------------------------------------------------------------------------------------------------------------------------------------------------------------------------------------------------------------------------------------------------------------------------------------------|--------------------------|
| <b>Administrative information</b> |         |                                                                                                                                                                                                                                                                                          |                          |
| Title                             | 1       | Descriptive title identifying the study design, population, interventions, and, if applicable, trial acronym                                                                                                                                                                             | ___ 1 ___                |
| Trial registration                | 2a      | Trial identifier and registry name. If not yet registered, name of intended registry                                                                                                                                                                                                     | ___ 3 ___                |
|                                   | 2b      | All items from the World Health Organization Trial Registration Data Set                                                                                                                                                                                                                 | ___ NA ___               |
| Protocol version                  | 3       | Date and version identifier                                                                                                                                                                                                                                                              | ___ NA ___               |
| Funding                           | 4       | Sources and types of financial, material, and other support                                                                                                                                                                                                                              | ___ 24-25 ___            |
| Roles and responsibilities        | 5a      | Names, affiliations, and roles of protocol contributors                                                                                                                                                                                                                                  | ___ 25 ___               |
|                                   | 5b      | Name and contact information for the trial sponsor                                                                                                                                                                                                                                       | ___ 24-25 ___            |
|                                   | 5c      | Role of study sponsor and funders, if any, in study design; collection, management, analysis, and interpretation of data; writing of the report; and the decision to submit the report for publication, including whether they will have ultimate authority over any of these activities | ___ 24-25 ___            |
|                                   | 5d      | Composition, roles, and responsibilities of the coordinating centre, steering committee, endpoint adjudication committee, data management team, and other individuals or groups overseeing the trial, if applicable (see Item 21a for data monitoring committee)                         | ___ 19 ___               |

1 **Introduction**

2

3 Background and rationale 6a Description of research question and justification for undertaking the trial, including summary of relevant studies (published and unpublished) examining benefits and harms for each intervention \_\_\_ 5 - 7 \_\_\_

4

5

6 6b Explanation for choice of comparators \_\_\_ 13 \_\_\_

7

8 Objectives 7 Specific objectives or hypotheses \_\_\_ 6 - 7 \_\_\_

9

10 Trial design 8 Description of trial design including type of trial (eg, parallel group, crossover, factorial, single group), allocation ratio, and framework (eg, superiority, equivalence, noninferiority, exploratory) \_\_\_ 7 - 8 \_\_\_

11

12

13

14 **Methods: Participants, interventions, and outcomes**

15

16 Study setting 9 Description of study settings (eg, community clinic, academic hospital) and list of countries where data will be collected. Reference to where list of study sites can be obtained \_\_\_ 7 \_\_\_

17

18

19 Eligibility criteria 10 Inclusion and exclusion criteria for participants. If applicable, eligibility criteria for study centres and individuals who will perform the interventions (eg, surgeons, psychotherapists) \_\_\_ 8 - 9 \_\_\_

20

21

22 Interventions 11a Interventions for each group with sufficient detail to allow replication, including how and when they will be administered \_\_\_ 11 - 13 \_\_\_

23

24

25 11b Criteria for discontinuing or modifying allocated interventions for a given trial participant (eg, drug dose change in response to harms, participant request, or improving/worsening disease) \_\_\_ 19 - 21 \_\_\_

26

27

28 11c Strategies to improve adherence to intervention protocols, and any procedures for monitoring adherence (eg, drug tablet return, laboratory tests) \_\_\_ 19 - 21 \_\_\_

29

30

31 11d Relevant concomitant care and interventions that are permitted or prohibited during the trial \_\_\_ NA \_\_\_

32

33

34 Outcomes 12 Primary, secondary, and other outcomes, including the specific measurement variable (eg, systolic blood pressure), analysis metric (eg, change from baseline, final value, time to event), method of aggregation (eg, median, proportion), and time point for each outcome. Explanation of the clinical relevance of chosen efficacy and harm outcomes is strongly recommended \_\_\_ 13 - 16 \_\_\_

35

36

37

38

39

40 Participant timeline 13 Time schedule of enrolment, interventions (including any run-ins and washouts), assessments, and visits for participants. A schematic diagram is highly recommended (see Figure) \_\_\_ 34 \_\_\_

41

42

1 Sample size 14 Estimated number of participants needed to achieve study objectives and how it was determined, including \_\_\_ 9 - 10 \_\_\_  
 2 clinical and statistical assumptions supporting any sample size calculations

3  
 4 Recruitment 15 Strategies for achieving adequate participant enrolment to reach target sample size \_\_\_ 9 - 10 \_\_\_  
 5

6 **Methods: Assignment of interventions (for controlled trials)**

7 Allocation:

8  
 9  
 10 Sequence 16a Method of generating the allocation sequence (eg, computer-generated random numbers), and list of any \_\_\_ 10 \_\_\_  
 11 generation factors for stratification. To reduce predictability of a random sequence, details of any planned restriction  
 12 (eg, blocking) should be provided in a separate document that is unavailable to those who enrol participants  
 13 or assign interventions  
 14

15  
 16 Allocation 16b Mechanism of implementing the allocation sequence (eg, central telephone; sequentially numbered, \_\_\_ 10 \_\_\_  
 17 concealment opaque, sealed envelopes), describing any steps to conceal the sequence until interventions are assigned  
 18 mechanism  
 19

20 Implementation 16c Who will generate the allocation sequence, who will enrol participants, and who will assign participants to \_\_\_ 10 \_\_\_  
 21 interventions  
 22

23  
 24 Blinding (masking) 17a Who will be blinded after assignment to interventions (eg, trial participants, care providers, outcome \_\_\_ 10 \_\_\_  
 25 assessors, data analysts), and how  
 26

27 17b If blinded, circumstances under which unblinding is permissible, and procedure for revealing a participant's \_\_\_ NA \_\_\_  
 28 allocated intervention during the trial  
 29  
 30

31 **Methods: Data collection, management, and analysis**

32  
 33 Data collection 18a Plans for assessment and collection of outcome, baseline, and other trial data, including any related \_\_\_ 16 - 19 \_\_\_  
 34 methods processes to promote data quality (eg, duplicate measurements, training of assessors) and a description of  
 35 study instruments (eg, questionnaires, laboratory tests) along with their reliability and validity, if known.  
 36 Reference to where data collection forms can be found, if not in the protocol  
 37

38  
 39 18b Plans to promote participant retention and complete follow-up, including list of any outcome data to be \_\_\_ 10, 16 - 17 \_\_\_  
 40 collected for participants who discontinue or deviate from intervention protocols  
 41  
 42



|    |                                 |     |                                                                                                                                                                                                                                                                                                                                       |             |
|----|---------------------------------|-----|---------------------------------------------------------------------------------------------------------------------------------------------------------------------------------------------------------------------------------------------------------------------------------------------------------------------------------------|-------------|
| 1  | Data management                 | 19  | Plans for data entry, coding, security, and storage, including any related processes to promote data quality (eg, double data entry; range checks for data values). Reference to where details of data management procedures can be found, if not in the protocol                                                                     | __17 - 18__ |
| 2  |                                 |     |                                                                                                                                                                                                                                                                                                                                       |             |
| 3  |                                 |     |                                                                                                                                                                                                                                                                                                                                       |             |
| 4  |                                 |     |                                                                                                                                                                                                                                                                                                                                       |             |
| 5  | Statistical methods             | 20a | Statistical methods for analysing primary and secondary outcomes. Reference to where other details of the statistical analysis plan can be found, if not in the protocol                                                                                                                                                              | __18 - 19__ |
| 6  |                                 |     |                                                                                                                                                                                                                                                                                                                                       |             |
| 7  |                                 |     |                                                                                                                                                                                                                                                                                                                                       |             |
| 8  |                                 | 20b | Methods for any additional analyses (eg, subgroup and adjusted analyses)                                                                                                                                                                                                                                                              | __18 - 19__ |
| 9  |                                 |     |                                                                                                                                                                                                                                                                                                                                       |             |
| 10 |                                 | 20c | Definition of analysis population relating to protocol non-adherence (eg, as randomised analysis), and any statistical methods to handle missing data (eg, multiple imputation)                                                                                                                                                       | __18 - 19__ |
| 11 |                                 |     |                                                                                                                                                                                                                                                                                                                                       |             |
| 12 |                                 |     |                                                                                                                                                                                                                                                                                                                                       |             |
| 13 |                                 |     |                                                                                                                                                                                                                                                                                                                                       |             |
| 14 | <b>Methods: Monitoring</b>      |     |                                                                                                                                                                                                                                                                                                                                       |             |
| 15 |                                 |     |                                                                                                                                                                                                                                                                                                                                       |             |
| 16 | Data monitoring                 | 21a | Composition of data monitoring committee (DMC); summary of its role and reporting structure; statement of whether it is independent from the sponsor and competing interests; and reference to where further details about its charter can be found, if not in the protocol. Alternatively, an explanation of why a DMC is not needed | __19__      |
| 17 |                                 |     |                                                                                                                                                                                                                                                                                                                                       |             |
| 18 |                                 |     |                                                                                                                                                                                                                                                                                                                                       |             |
| 19 |                                 |     |                                                                                                                                                                                                                                                                                                                                       |             |
| 20 |                                 |     |                                                                                                                                                                                                                                                                                                                                       |             |
| 21 |                                 |     |                                                                                                                                                                                                                                                                                                                                       |             |
| 22 |                                 | 21b | Description of any interim analyses and stopping guidelines, including who will have access to these interim results and make the final decision to terminate the trial                                                                                                                                                               | __19__      |
| 23 |                                 |     |                                                                                                                                                                                                                                                                                                                                       |             |
| 24 |                                 |     |                                                                                                                                                                                                                                                                                                                                       |             |
| 25 | Harms                           | 22  | Plans for collecting, assessing, reporting, and managing solicited and spontaneously reported adverse events and other unintended effects of trial interventions or trial conduct                                                                                                                                                     | __20 - 21__ |
| 26 |                                 |     |                                                                                                                                                                                                                                                                                                                                       |             |
| 27 |                                 |     |                                                                                                                                                                                                                                                                                                                                       |             |
| 28 | Auditing                        | 23  | Frequency and procedures for auditing trial conduct, if any, and whether the process will be independent from investigators and the sponsor                                                                                                                                                                                           | __NA__      |
| 29 |                                 |     |                                                                                                                                                                                                                                                                                                                                       |             |
| 30 |                                 |     |                                                                                                                                                                                                                                                                                                                                       |             |
| 31 |                                 |     |                                                                                                                                                                                                                                                                                                                                       |             |
| 32 | <b>Ethics and dissemination</b> |     |                                                                                                                                                                                                                                                                                                                                       |             |
| 33 |                                 |     |                                                                                                                                                                                                                                                                                                                                       |             |
| 34 | Research ethics approval        | 24  | Plans for seeking research ethics committee/institutional review board (REC/IRB) approval                                                                                                                                                                                                                                             | __24__      |
| 35 |                                 |     |                                                                                                                                                                                                                                                                                                                                       |             |
| 36 |                                 |     |                                                                                                                                                                                                                                                                                                                                       |             |
| 37 | Protocol amendments             | 25  | Plans for communicating important protocol modifications (eg, changes to eligibility criteria, outcomes, analyses) to relevant parties (eg, investigators, REC/IRBs, trial participants, trial registries, journals, regulators)                                                                                                      | __19__      |
| 38 |                                 |     |                                                                                                                                                                                                                                                                                                                                       |             |
| 39 |                                 |     |                                                                                                                                                                                                                                                                                                                                       |             |
| 40 |                                 |     |                                                                                                                                                                                                                                                                                                                                       |             |
| 41 |                                 |     |                                                                                                                                                                                                                                                                                                                                       |             |
| 42 |                                 |     |                                                                                                                                                                                                                                                                                                                                       |             |
| 43 |                                 |     |                                                                                                                                                                                                                                                                                                                                       |             |
| 44 |                                 |     |                                                                                                                                                                                                                                                                                                                                       |             |
| 45 |                                 |     |                                                                                                                                                                                                                                                                                                                                       |             |
| 46 |                                 |     |                                                                                                                                                                                                                                                                                                                                       |             |

|    |                               |     |                                                                                                                                                                                                                                                                                     |                 |
|----|-------------------------------|-----|-------------------------------------------------------------------------------------------------------------------------------------------------------------------------------------------------------------------------------------------------------------------------------------|-----------------|
| 1  | Consent or assent             | 26a | Who will obtain informed consent or assent from potential trial participants or authorised surrogates, and how (see Item 32)                                                                                                                                                        | ___ 9 ___       |
| 2  |                               |     |                                                                                                                                                                                                                                                                                     |                 |
| 3  |                               |     |                                                                                                                                                                                                                                                                                     |                 |
| 4  |                               | 26b | Additional consent provisions for collection and use of participant data and biological specimens in ancillary studies, if applicable                                                                                                                                               | ___ NA ___      |
| 5  |                               |     |                                                                                                                                                                                                                                                                                     |                 |
| 6  |                               |     |                                                                                                                                                                                                                                                                                     |                 |
| 7  | Confidentiality               | 27  | How personal information about potential and enrolled participants will be collected, shared, and maintained in order to protect confidentiality before, during, and after the trial                                                                                                | ___ 17 - 18 ___ |
| 8  |                               |     |                                                                                                                                                                                                                                                                                     |                 |
| 9  |                               |     |                                                                                                                                                                                                                                                                                     |                 |
| 10 | Declaration of interests      | 28  | Financial and other competing interests for principal investigators for the overall trial and each study site                                                                                                                                                                       | ___ 24 ___      |
| 11 |                               |     |                                                                                                                                                                                                                                                                                     |                 |
| 12 |                               |     |                                                                                                                                                                                                                                                                                     |                 |
| 13 | Access to data                | 29  | Statement of who will have access to the final trial dataset, and disclosure of contractual agreements that limit such access for investigators                                                                                                                                     | ___ 24 ___      |
| 14 |                               |     |                                                                                                                                                                                                                                                                                     |                 |
| 15 |                               |     |                                                                                                                                                                                                                                                                                     |                 |
| 16 | Ancillary and post-trial care | 30  | Provisions, if any, for ancillary and post-trial care, and for compensation to those who suffer harm from trial participation                                                                                                                                                       | ___ NA ___      |
| 17 |                               |     |                                                                                                                                                                                                                                                                                     |                 |
| 18 |                               |     |                                                                                                                                                                                                                                                                                     |                 |
| 19 |                               |     |                                                                                                                                                                                                                                                                                     |                 |
| 20 | Dissemination policy          | 31a | Plans for investigators and sponsor to communicate trial results to participants, healthcare professionals, the public, and other relevant groups (eg, via publication, reporting in results databases, or other data sharing arrangements), including any publication restrictions | ___ 17 - 18 ___ |
| 21 |                               |     |                                                                                                                                                                                                                                                                                     |                 |
| 22 |                               |     |                                                                                                                                                                                                                                                                                     |                 |
| 23 |                               |     |                                                                                                                                                                                                                                                                                     |                 |
| 24 |                               | 31b | Authorship eligibility guidelines and any intended use of professional writers                                                                                                                                                                                                      | ___ NA ___      |
| 25 |                               |     |                                                                                                                                                                                                                                                                                     |                 |
| 26 |                               | 31c | Plans, if any, for granting public access to the full protocol, participant-level dataset, and statistical code                                                                                                                                                                     | ___ 24 ___      |
| 27 |                               |     |                                                                                                                                                                                                                                                                                     |                 |
| 28 |                               |     |                                                                                                                                                                                                                                                                                     |                 |
| 29 | <b>Appendices</b>             |     |                                                                                                                                                                                                                                                                                     |                 |
| 30 |                               |     |                                                                                                                                                                                                                                                                                     |                 |
| 31 | Informed consent materials    | 32  | Model consent form and other related documentation given to participants and authorised surrogates                                                                                                                                                                                  | _____           |
| 32 |                               |     |                                                                                                                                                                                                                                                                                     |                 |
| 33 |                               |     |                                                                                                                                                                                                                                                                                     |                 |
| 34 | Biological specimens          | 33  | Plans for collection, laboratory evaluation, and storage of biological specimens for genetic or molecular analysis in the current trial and for future use in ancillary studies, if applicable                                                                                      | _____           |
| 35 |                               |     |                                                                                                                                                                                                                                                                                     |                 |
| 36 |                               |     |                                                                                                                                                                                                                                                                                     |                 |

\*It is strongly recommended that this checklist be read in conjunction with the SPIRIT 2013 Explanation & Elaboration for important clarification on the items. Amendments to the protocol should be tracked and dated. The SPIRIT checklist is copyrighted by the SPIRIT Group under the Creative Commons "[Attribution-NonCommercial-NoDerivs 3.0 Unported](https://creativecommons.org/licenses/by-nc-nd/3.0/)" license.

# BMJ Open

## Peer-led family-centered Problem Management Plus for Immigrants (PMP-I) for mental health promotion among immigrants in the United States: protocol for a pilot, randomized controlled feasibility trial

|                                 |                                                                                                                                                                                                                                                                                                                                                                                                                                                                                                                                                                                                                                                                                                                                                                                                                                                                                                                                                                                                                                                                                                                                      |
|---------------------------------|--------------------------------------------------------------------------------------------------------------------------------------------------------------------------------------------------------------------------------------------------------------------------------------------------------------------------------------------------------------------------------------------------------------------------------------------------------------------------------------------------------------------------------------------------------------------------------------------------------------------------------------------------------------------------------------------------------------------------------------------------------------------------------------------------------------------------------------------------------------------------------------------------------------------------------------------------------------------------------------------------------------------------------------------------------------------------------------------------------------------------------------|
| Journal:                        | <i>BMJ Open</i>                                                                                                                                                                                                                                                                                                                                                                                                                                                                                                                                                                                                                                                                                                                                                                                                                                                                                                                                                                                                                                                                                                                      |
| Manuscript ID                   | bmjopen-2022-061353.R1                                                                                                                                                                                                                                                                                                                                                                                                                                                                                                                                                                                                                                                                                                                                                                                                                                                                                                                                                                                                                                                                                                               |
| Article Type:                   | Protocol                                                                                                                                                                                                                                                                                                                                                                                                                                                                                                                                                                                                                                                                                                                                                                                                                                                                                                                                                                                                                                                                                                                             |
| Date Submitted by the Author:   | 21-Mar-2022                                                                                                                                                                                                                                                                                                                                                                                                                                                                                                                                                                                                                                                                                                                                                                                                                                                                                                                                                                                                                                                                                                                          |
| Complete List of Authors:       | Poudel-Tandukar, Kalpana ; University of Massachusetts Amherst, Elaine Marieb College of Nursing<br>Jacelon, Cynthia; University of Massachusetts Amherst, Elaine Marieb College of Nursing<br>Martell, Christopher; University of Massachusetts Amherst, Department of Psychological and Brain Sciences, College of Natural Sciences<br>Poudel, Krishna; University of Massachusetts Amherst, Department of Health Promotion and Policy, School of Public Health and Health Sciences<br>Rai, Shan; Bhutanese Christian Society of Western Massachusetts<br>Ramdam, Razu; Bhutanese Christian Society of Western Massachusetts<br>Laws, Holly; University of Massachusetts Amherst, Department of Psychological and Brain Sciences, College of Natural Sciences<br>Meyer, Jerrold; University of Massachusetts Amherst, Department of Psychological and Brain Sciences, College of Natural Sciences<br>Bertone-Johnson, Elizabeth; University of Massachusetts Amherst, Department of Biostatistics and Epidemiology, School of Public Health and Health Sciences<br>Hollon, Steven; Vanderbilt University, Department of Psychology |
| <b>Primary Subject Heading</b>: | Mental health                                                                                                                                                                                                                                                                                                                                                                                                                                                                                                                                                                                                                                                                                                                                                                                                                                                                                                                                                                                                                                                                                                                        |
| Secondary Subject Heading:      | Epidemiology                                                                                                                                                                                                                                                                                                                                                                                                                                                                                                                                                                                                                                                                                                                                                                                                                                                                                                                                                                                                                                                                                                                         |
| Keywords:                       | EPIDEMIOLOGY, MENTAL HEALTH, PSYCHIATRY, PREVENTIVE MEDICINE                                                                                                                                                                                                                                                                                                                                                                                                                                                                                                                                                                                                                                                                                                                                                                                                                                                                                                                                                                                                                                                                         |
|                                 |                                                                                                                                                                                                                                                                                                                                                                                                                                                                                                                                                                                                                                                                                                                                                                                                                                                                                                                                                                                                                                                                                                                                      |

SCHOLARONE™  
Manuscripts

1  
2  
3 **Peer-led family-centered Problem Management Plus for Immigrants (PMP-I) for mental**  
4 **health promotion among immigrants in the United States: protocol for a pilot, randomized**  
5 **controlled feasibility trial**  
6  
7  
8  
9

10  
11  
12 Kalpana Poudel-Tandukar<sup>1</sup>, Cynthia S Jacelon<sup>1</sup>, Christopher R Martell<sup>2</sup>, Krishna C Poudel<sup>3</sup>, Shan  
13  
14 Rai<sup>4</sup>, Razu Ramdam<sup>4</sup>, Holly Laws<sup>2</sup>, Jerrold S Meyer<sup>2</sup>, Elizabeth R. Bertone-Johnson<sup>5</sup>, Steven D  
15  
16 Hollon<sup>6</sup>  
17  
18  
19  
20

21 <sup>1</sup>Elaine Marieb College of Nursing, University of Massachusetts Amherst, MA, USA

22  
23 <sup>2</sup>Department of Psychological and Brain Sciences, College of Natural Sciences, University of  
24  
25 Massachusetts Amherst, MA, USA  
26  
27

28 <sup>3</sup> Department of Health Promotion and Policy, School of Public Health and Health Sciences,  
29  
30 University of Massachusetts Amherst, MA, USA  
31  
32

33 <sup>4</sup>Bhutanese Christian Society of Western Massachusetts, Westfield, MA, USA  
34

35 <sup>5</sup>Department of Biostatistics and Epidemiology, School of Public Health and Health Sciences,  
36  
37 University of Massachusetts Amherst, MA, USA  
38  
39

40 <sup>6</sup>Department of Psychology, Vanderbilt University, Nashville, TN, USA  
41  
42  
43

44 \*Correspondence to: Kalpana Poudel-Tandukar, Ph.D., MPH, MPH, CGM

45 Associate Professor, Elaine Marieb College of Nursing, University of Massachusetts Amherst,

46  
47 220 Skinner Hall, 651 North Pleasant St, Amherst, MA 01003-9299, USA  
48  
49

50  
51 Tel: 1-413-545-5095; Fax: 1-413-577-2500  
52

53  
54 Email: [kalpana@umass.edu](mailto:kalpana@umass.edu)  
55  
56  
57

## Abstract

### Introduction

Research is needed to investigate preventive strategies to reduce mental health burden and assess effective implementation among immigrants. Problem Management Plus (PMP) is a low-intensity multicomponent psychological intervention developed by the World Health Organization that trained laypeople can deliver. PMP has been adapted as a prevention intervention and developed as Problem Management Plus for Immigrants (PMP-I), including psychoeducation, problem-solving, behavioral activations, and mind-body exercise, to address immigrants' multiple stressors. This pilot trial aims to assess the feasibility and acceptability of PMP-I and provide a preliminary estimate of the difference between PMP-I vs. community support services pamphlets on the primary outcomes of interest (stress, anxiety, and depressive symptoms) to inform the design of a large-scale intervention.

### Methods and analysis

The feasibility and acceptability of PMP-I will be assessed by measuring recruitment, session attendance, retention rates, program acceptability, and the fidelity of intervention delivery. This pilot trial will test preliminary effects of PMP-I vs. community support services pamphlets in a randomized controlled trial ( $N= 232$  participants from 116-families (2 members/family); 58 families randomized to condition intervention or control) on stress, anxiety, and depressive symptoms (primary outcomes), chronic physiological stress assessed in hair cortisol (secondary outcomes), and coping, family conflict resolution, and social networking (targets), with assessment at baseline, post-intervention, and 3-month post-intervention. Eligibility criteria for the primary study participants include Bhutanese  $\geq 18$  years resettled in Massachusetts with a score of  $\leq 14$  on

1  
2  
3 the Patient Health Questionnaire-9. All family members will be invited to participate in the family-  
4 based intervention (1-session/week for 5-week). Multilevel modeling will compare the longitudinal  
5 change in outcomes for each treatment arm.  
6  
7

### 8 9 10 **Ethics and dissemination**

11  
12 The Institutional Review Board of the University of Massachusetts Amherst approved this study  
13 (Protocol: 1837). Written informed consent will be obtained from all participants. The study results  
14 will be used to inform the design of a large-scale intervention and will be disseminated in peer-  
15 reviewed journals and conferences.  
16  
17

18  
19  
20  
21 **Trial registration number:** NCT04453709. Prospectively registered on 1<sup>st</sup> July 2020.  
22  
23

24  
25  
26 **Keywords:** Anxiety; Depression; Emotional Wellbeing; Mind-Body Intervention; Refugees; Social  
27 Wellbeing; Stress  
28  
29

### 30 31 32 **Strengths and limitations of this study**

- 33  
34  
35 • Whereas existing mental health interventions for immigrants are primarily based on treatment  
36 models to improve the access and quality of care for those with diagnosed mental health  
37 problems, this study is focused on developing, implementing, and pilot testing the effect of a  
38 culturally-tailored preventative behavioral intervention to reduce stress and prevent mental  
39 health problems among immigrants.  
40  
41
- 42  
43 • This study includes culturally-tailored psychoeducation, behavioral activation, problem-solving,  
44 and mind-body interventions that could help to address multiple psycho-socio-cultural stressors  
45 through revitalizing resources at the individual, family, and community levels.  
46  
47  
48  
49  
50  
51  
52  
53  
54  
55  
56  
57

- The proposed intervention will be delivered to participants in their family environment by interventionists from the same community they trust and understand their language and problems from their cultural lens.
- This study will be among the first to link a preventive intervention with both biomarkers of stress (hair cortisol) and perceived stress and, using longitudinal data, to examine change over time in stress.
- Though clinical diagnosis is the gold standard, such an approach is not feasible in community-based studies, so this study relies on self-report measures of anxiety and depressive symptoms.

## Introduction

Refugees resettled in the United States are vulnerable to mental health problems,<sup>1,2</sup> such as anxiety and depression due to stress resulting from integrating into a new culture.<sup>3-5</sup> Refugees' risk for mental health problems increases during their acculturative process due to exposure to multiple stressors, such as adjustment to a new culture with limited language and socio-cultural skills, perceived discrimination, and a lack of culturally mediated and protective social support resources.<sup>5</sup> <sup>6</sup> Although mental health treatments are available to help alleviate the intrapersonal, social, and economic costs of mental disorders, refugees greatly underutilize these services.<sup>1,7,8</sup> Thus, evidence-based, culturally tailored preventative mental health interventions are needed for the growing number of refugees in the United States.

Existing interventions are focused explicitly on treatment models to provide quality care for those with diagnosed mental health problems<sup>9</sup> that do little to help reduce stress and prevent mental disorders for those who have not yet developed diagnosable symptoms. For prevention, a culturally tailored intervention that addresses multiple psycho-socio-cultural stressors, including social and cultural integration, holds good promise.<sup>10,11</sup> Community-based preventative interventions that

1  
2  
3 promote positive impacts of social and cultural behaviors on mental health outcomes by protective  
4  
5 resources are needed for the growing number of refugees dealing with life complexities.<sup>12, 13</sup> A  
6  
7 review of community-based mental health interventions in refugees resettled to the United States  
8  
9 suggests<sup>14</sup> that counseling, health promotion, and skill-building workshops facilitated by refugee  
10  
11 peers<sup>15-17</sup> are helpful to reduce the psychological distress of many refugees who may be struggling  
12  
13 with individual or family difficulties. Specifically, the Centers for Disease Control and Prevention  
14  
15 (CDC) recommends using a non-clinical, community support approach to prevent mental illness  
16  
17 among refugees resettled in the United States.<sup>18</sup>  
18  
19

20  
21 Problem Management Plus (PMP) is a low-intensity evidence-based psychological intervention  
22  
23 developed by the World Health Organization (WHO) that trained laypeople can deliver.<sup>19, 20</sup> PMP  
24  
25 systematically teaches four strategies: stress management through mind-body exercises,<sup>21-24</sup>  
26  
27 problem-solving,<sup>25</sup> behavioral activations,<sup>26-33</sup> and skills to strengthen social support for individuals  
28  
29 with psychological distress. PMP has been proven successful in reducing depression for women  
30  
31 with mental disorders in Pakistan in a group setting.<sup>34</sup> We have adapted PMP to develop our  
32  
33 Problem Management Plus for Immigrants (PMP-I) following a successful result of a pilot social  
34  
35 and emotional wellbeing intervention. The pilot intervention included psychoeducation, mind-body  
36  
37 exercise, problem-solving, and social support and reduced more than 50% prevalence of anxiety  
38  
39 and depression from pre- to post-intervention among Bhutanese refugees when delivered in either a  
40  
41 group<sup>35</sup> or a family setting.<sup>36</sup> While promising, these pilot results were drawn from only those  
42  
43 receiving the treatment; no control group was available for comparison. Thus, the present study is  
44  
45 to apply the adapted PMP in a randomized controlled trial. The present study is indicated for  
46  
47 several reasons: our intervention model demands integration of social and emotional stressors;  
48  
49 promising results of PMP in a non-controlled pilot study; the need to test the efficacy of PMP using  
50  
51  
52  
53  
54  
55  
56  
57  
58  
59  
60



1  
2  
3 the more rigorous randomized controlled trial (RCT) study design; strong evidence of family and  
4 community ties in health care process; and growing consensus among community, scientists, and  
5  
6  
7  
8 policymakers on the need for family-based care models that are sustainable.  
9

## 10 11 12 **Objectives and hypothesis**

13  
14 The main objectives of this study are:

- 15  
16
- 17 a) To assess the feasibility and acceptability of PMP-I: i) recruitment, session attendance, retention  
18 rates, and program acceptability; ii) feasibility of measures for assessing inclusion/exclusion and  
19 fidelity of intervention delivery, and iii) barriers and facilitators of intervention using interview and  
20  
21  
22  
23  
24 focus group discussion with participants and facilitators.  
25
  - 26 b) To test the preliminary outcomes of PMP-I among Bhutanese adults 18 years or older living in  
27  
28  
29  
30  
31  
32  
33  
34  
35  
36  
37  
38  
39  
40  
41  
42  
43  
44  
45  
46  
47  
48  
49  
50  
51  
52  
53  
54  
55  
56  
57  
58  
59  
60  
Massachusetts with a score of 14 or below on the Patient Health Questionnaire-9 with trained  
community facilitators. Our central hypothesis is that PMP-I will reduce stress, anxiety, and  
depressive symptoms. We will test preliminary effects of PMP-I vs. community support services  
pamphlets in a randomized pilot trial (N=232 participants from 116 families (two members per  
family); 58 families per intervention and control) on perceived stress,<sup>37</sup> anxiety and depressive  
symptoms (primary outcomes).<sup>38</sup> chronic physiological stress assessed in hair cortisol (secondary  
outcome), and self-efficacy,<sup>39</sup> coping,<sup>40</sup> family conflict resolution,<sup>41</sup> family satisfaction,<sup>42</sup> social  
support (targets),<sup>43</sup> and social networks<sup>44</sup> with assessments at baseline, post-, and 3-month post-  
intervention.

## 51 52 **Methods and analysis**

### 53 54 **Design and setting**

1  
2  
3 This study will be conducted among resettled Bhutanese adults living in Massachusetts. Since 2008,  
4  
5 Bhutanese people have been resettled in various states of the United States and are one of the  
6  
7 largest groups of South Asian refugees (about 90 000).<sup>45</sup> They bear a high burden of mental health  
8  
9 problems both in the nation (depression: 20%; suicide rate: 21.5 per 100 000)<sup>18</sup> and in western  
10  
11 Massachusetts (depression: 23.8%; anxiety: 34.5%).<sup>46</sup> Given the importance of family relationships,  
12  
13 communication, and coping in mental health,<sup>47</sup> the preventative social and emotional wellbeing  
14  
15 intervention was designed for resettled Bhutanese adults in western Massachusetts using a  
16  
17 community-based participatory research (CBPR) approach.<sup>35</sup>  
18  
19  
20

21  
22 This mixed-methods study will incorporate a two-arm randomized controlled feasibility trial  
23  
24 and qualitative evaluation of PMP-I intervention's acceptability to a range of stakeholders. The  
25  
26 study protocol has been reported following the Standard Protocol Items: Recommendations for  
27  
28 Interventional Trials (SPIRIT). **Figure 1** shows the study flowchart, and **Table 1** shows an  
29  
30 overview of study measures.  
31  
32  
33  
34

## 35 **Participant recruitment**

### 36 *Participant inclusion criteria using a screening measure*

37  
38 This study will include eligible parents and adult children aged 18 and above interested in  
39  
40 participating as primary study participants. At baseline, we will use a screening tool to identify  
41  
42 individuals without significant depressive symptoms, as we aim to evaluate the effect of our  
43  
44 intervention to prevent depression rather than treat depression. Eligibility criteria for our primary  
45  
46 study participants include Bhutanese adults 18 years or older (both parents and children of each  
47  
48 family) resettled in Massachusetts with a score of 14 or below on the Patient Health Questionnaire  
49  
50 (PHQ-9), a screening questionnaire for depression. Our statistical analysis will focus on data from  
51  
52  
53  
54  
55  
56  
57  
58  
59  
60

1  
2  
3 primary study participants only with baseline PHQ-9 scores 14 or below. However, all other  
4  
5 interested adult family members, both parents and their adult children, regardless of PHQ-9 score,  
6  
7 will be invited to participate in the intervention. The PHQ-9 scores of participants will not be  
8  
9 disclosed to anyone to maintain individual confidentiality. Besides, individuals with PHQ-9  
10  
11 screening scores '15-19' (moderately severe depression) and '20-27' (severe depression) will be  
12  
13 provided with feedback on their screening questionnaire outcomes confidentially. They will be  
14  
15 encouraged to consult their primary health care providers.  
16  
17  
18  
19  
20

### 21 ***Participant exclusion criteria***

22  
23 Participants with clinically diagnosed mental disorders and those taking psychiatric medications for  
24  
25 any mental health problems will also be encouraged to participate in the family-based intervention  
26  
27 activities. However, in our primary statistical analysis, we will not consider data from those  
28  
29 participants with PHQ-9 scores of 15 or above or diagnosed with mental health problems.  
30  
31  
32  
33  
34

### 35 **Informed consent**

36  
37 The principal investigator (PI) has prepared an informed consent document including an  
38  
39 explanation on study background, screening, recruitment criteria, sample size, data collection, and  
40  
41 intervention, study risks and benefits, confidentiality, National Institute of Mental Health Data  
42  
43 Archive (NDA) data sharing policy, and hair samples collection procedure (online supplemental  
44  
45 file). Trained community research assistants (RAs) will inform screening and study procedures to  
46  
47 each participant using UMass Amherst Institutional Review Board (IRB)-approved single informed  
48  
49 consent form visiting in-person. Once participants understand study details, RAs will request their  
50  
51 signature or initials or fingerprint for those who cannot write in the consent form before data  
52  
53  
54  
55  
56  
57

1  
2  
3 collection. Participants will be reminded that their participation in the study is voluntary and free to  
4  
5 leave the study without penalty.  
6  
7  
8  
9

### 10 **Sample size and power calculations**

11  
12 The goal of the pilot project is to estimate the magnitude of the difference between the preventive  
13  
14 intervention and the education control on the primary outcomes of interest to inform the design of a  
15  
16 large-scale intervention. We conducted a power analysis to detect an effect size (ES) as small as  
17  
18  $ES=.30$  with  $\alpha = .05$  and power of  $.80$ . We may find a larger effect in our pilot, but our  
19  
20 understanding is that power estimates should be based on the smallest effect we want to detect  
21  
22 rather than the size of the effect that we expect.<sup>48</sup> Analyses were performed using Optimal Design<sup>49</sup>  
23  
24 by accounting for the intra-correlation among family members of  $.10$  and  $\alpha = .05$ , we would  
25  
26 have 80% power to detect a standardized difference of  $ES=.30$  between two treatment groups of  
27  
28 116 families (58 per treatment arm) with an equal probability of being randomized to each of our  
29  
30 two intervention arms.  
31  
32  
33  
34  
35  
36  
37

### 38 **Randomization**

39  
40 We will randomly allocate selected families into intervention and control groups using a random  
41  
42 sampling method after the baseline survey. RAs are unaware of which group the family will be  
43  
44 randomized to when collecting baseline data. We will randomly assign 116 interested families (58  
45  
46 families per intervention and control) using a random number table. For random allocation, first, the  
47  
48 PI will prepare the sampling frame that lists interested families, then assign a number to each family  
49  
50 in the sampling frame, and finally select 116 numbers using a table of random numbers. We will  
51  
52  
53  
54  
55  
56  
57  
58  
59  
60

1  
2  
3 assign a random number selected at the first attempt for intervention and the second attempt for  
4  
5 control.  
6

7  
8 Procedures are in place for tracking the participants for intervention and follow-up (e.g., contact  
9  
10 address and phone). RAs will visit selected families and brief them about study procedures,  
11  
12 informed consent, and procedures to protect human subjects. Two adult members of the selected  
13  
14 families who meet the inclusion criteria and give informed consent will be recruited for the study.  
15  
16 We will follow up with all families randomized to either study arm. We will not follow up with  
17  
18 participants if they decide to end their participation at a particular time point of our study. But, we  
19  
20 will include their already collected data in our analysis. Given our strong community networks and  
21  
22 mobilization of community RAs, we anticipate low attrition rates in practice.  
23  
24  
25  
26  
27

### 28 **Problem Management Plus for Immigrants (PMP-I)**

29  
30 PMP-I is a 5-week, peer-led, culturally tailored mental health promotion program that includes  
31  
32 psychoeducation, problem-solving, behavioral activation (90 minutes), breathing exercises, and  
33  
34 yoga (90 minutes) in a family setting. PMP-I will use a structured approach, including once-a-week  
35  
36 face-to-face sessions, yoga practice, breathing exercises, homework that includes practice activities,  
37  
38 rebuilding individual skills, or learning new skills to reduce stress.  
39  
40  
41

42 Our intervention aims to develop skills in coping adaptively in a new culture, seeking help and  
43  
44 support for mental health problems, and other life skills opportunities that can improve their quality  
45  
46 of life. **Module 1: Managing Stress** includes yoga, breathing exercise, stress-management  
47  
48 sessions, and practice exercises to develop coping strategies that are most helpful to reduce stress  
49  
50 and then plan a strategy to carry out those solutions. **Module 2: Managing Problems** includes  
51  
52 practice exercises to identify the problems causing the most concern, develop solutions that are  
53  
54  
55  
56  
57

1  
2  
3 most helpful in addressing the problem, and then plan a strategy to carry out those solutions.

4  
5 **Module 3: Behavioral Activation** includes communication skill sessions and practice exercises to  
6  
7 identify pleasant activities (time to yourself; connecting with others; self-care), breaking down the  
8  
9 task into smaller steps, and schedule tasks, and then plan a strategy to carry out those tasks. **Module**  
10  
11 **4: Strengthening Social Support** includes social skills sessions and practice exercises to identify  
12  
13 at least one person or service from whom the participant feels comfortable getting some support,  
14  
15 and to plan exactly what the participant is going to do, and then schedule a day to carry out the  
16  
17 tasks. **Module 5: Staying Well** includes practice exercises to make a plan that helps to create a  
18  
19 supportive family environment.  
20  
21  
22  
23

24 Community interventionists (CIs) are trained community members with at least a high school  
25  
26 level of education, and no formal training or prior experience with mental health will deliver the  
27  
28 PMP-I. Dr. Christopher Martell, board-certified in behavioral and cognitive psychology and clinical  
29  
30 psychology and a Massachusetts Licensed Psychologist, will provide 12 days of training to the  
31  
32 interventionists in collaboration with the PI and Dr. Steven D. Hollon (Professor of Psychiatry,  
33  
34 Psychology and Human Development) following the World Health Organization PMP Helpers'  
35  
36 Training Guide<sup>50</sup> adapted for PMP-I. Classroom training includes information about stress,  
37  
38 depression, mental health problems, the rationale for each intervention strategy, necessary helping  
39  
40 skills, practice plan formulation, role-plays, peer observations, and group discussion related to core  
41  
42 intervention concepts, practices, and supervision skills. Supervision involves discussing  
43  
44 participants' progress and difficulties experienced when delivering strategies and role-playing on  
45  
46 managing problems or practicing skills. They will use the PMP-I intervention manual to provide  
47  
48 PMP-I to community members in family settings under field supervisors and PI's supervision. We  
49  
50 will conduct a formal evaluation of the interventionists' readiness to implement/supervise the PMP-I  
51  
52  
53  
54  
55  
56  
57  
58  
59  
60

1  
2  
3 intervention, such as using the manual, answering questions, managing time, using a fidelity  
4 checklist, practicing exercise, and role play to provide feedback as necessary.  
5  
6

7  
8 A licensed yoga trainer will provide 4 hours of breathing exercises and 16 hours of yoga to CIs  
9  
10 and field supervisors using a mind-body exercise training manual. Classroom training includes  
11 theoretical and practices to guide participants in mind-body exercises for attention to breath, body  
12 sensation, emotional awareness, and mental function on different postures of yoga practices such as  
13 *Pranayama* (3 poses) and *Asana* (21 poses). Training will include practice assessment at the end to  
14 ensure that all field staff is trained, using a checklist, practice exercise, and role-plays.  
15  
16  
17  
18  
19  
20  
21  
22  
23

### 24 **Community Support Service Program**

25  
26 Bhutanese community members expressed that knowing the health and life skill development  
27 program available in their communities would benefit them in strengthening their life skills.<sup>51</sup> By  
28 considering their request, we have prepared pamphlets including names, contact, and service details  
29 of community and health organizations in the area where they live. CIs will distribute community  
30 support service program pamphlets to control families.  
31  
32  
33  
34  
35  
36  
37  
38  
39

### 40 **Feasibility and acceptability assessment**

41  
42 The PMP trainer's training guidelines provide specific tools for evaluating and monitoring the  
43 intervention, which we use to monitor intervention delivery fidelity. These tools are PMP Quiz,  
44 PMP Helper's Supervision Form, PMP Helper Classroom-based Competency Assessment, PMP  
45 Helper In-field based Competency Assessment, PMP Trainer/Supervisor Competency Assessment,  
46 and Session-by-Session Checklists for PMP Helpers.<sup>50</sup> We have adapted these tools in the context  
47 of our program contents. Using these standard tools, we will evaluate session-by-session classroom  
48  
49  
50  
51  
52  
53  
54  
55  
56  
57

1  
2  
3 and in-field based competencies of community interventionists and field supervisors and provide  
4  
5 them feedback as needed using supervision forms, role-plays, group discussion, and training.  
6

7  
8 At the field level, field supervisors will monitor intervention sessions delivered by community  
9  
10 interventionists using standard checklists. Items include adherence to the manual, percent of  
11  
12 intervention content administered, proper use of time/materials, and adequate response to  
13  
14 participants' questions. They will also monitor participants' engagement, acceptability, and  
15  
16 satisfaction via brief questionnaires with participants and interventionists during and after  
17  
18 intervention completion. Moreover, community interventionists will be asked to complete a  
19  
20 structured checklist on the attendance, compliance, and satisfaction towards intervention  
21  
22 components immediately after each session.  
23  
24

25  
26 The PI will conduct a focus group discussion (FGD) in the Nepali language with  
27  
28 interventionists, supervisors, and participants separately to collect information on barriers and  
29  
30 facilitators of intervention, perceptions about whether the intervention met participants' needs, and  
31  
32 feedback on how effectively the program team worked with participants. Interviews and FGD will  
33  
34 be documented verbatim in a written transcript for subsequent analysis. All qualitative data will be  
35  
36 analyzed using thematic content analysis.<sup>52</sup> Feedback provided by the field staff will be reviewed  
37  
38 and coded to identify recurrent themes regarding the intervention's acceptability. Fidelity data will  
39  
40 be used to assess intervention content and transmission.  
41  
42  
43  
44  
45  
46

## 47 **Primary outcome measures**

### 48 **Anxiety and Depressive Symptoms**

49  
50 The Hopkins Symptom Checklist-25 (HSCL-25) will be used to measure anxiety, and depressive  
51  
52 symptoms experienced over the past month.<sup>38</sup> It is composed of a 10-item subscale for anxiety and  
53  
54  
55  
56  
57



1  
2  
3 a 15-item subscale for depression, with each item scored on a Likert scale from 1 (not at all) to 4  
4  
5 (extremely). The scale has high internal consistency (Cronbach's  $\alpha$ ) for anxiety (0.95) and  
6  
7 depression (0.94) in the Bhutanese study.<sup>35</sup>  
8  
9

## 10 11 12 **Perceived Stress**

13  
14 The 10-item Cohen Perceived Stress Scale (PSS) will be used to assess perceived stress.<sup>37</sup> The PSS  
15  
16 uses a 5-point Likert scale (ranging from 0, "never" to 4, "very often") to assess psychological stress  
17  
18 experienced during the past month, including the extent to which situations felt unpredictable,  
19  
20 uncomfortable, and overwhelming. In the Bhutanese study, the scale has high internal consistency  
21  
22 (Cronbach's  $\alpha = 0.80$ ).<sup>35</sup>  
23  
24  
25  
26  
27

## 28 **Secondary outcome measures**

### 29 30 **Physiological stress**

31  
32 We will use the enzyme-linked immunosorbent assay (ELISA) cortisol hair test (average hormone  
33  
34 levels over the past three months) as a biomarker to measure physiological stress. Hair samples will  
35  
36 be processed in the neuroendocrine lab at the University of Massachusetts Amherst.<sup>53, 54</sup> Sensitive  
37  
38 and specific enzyme immunoassay (Arbor Assays) will be used for the analysis. The assay has  
39  
40 intra- and inter-assay coefficients of variation of <10%.  
41  
42  
43  
44  
45  
46

### 47 **Other measures**

#### 48 49 **Coping strategy**

50  
51 Coping strategy will be measured using a 32-item Coping Strategies Inventory-Short Form (CSI-  
52  
53 SF).<sup>40</sup> The CSI-SF includes two overall coping factors, Engagement and Disengagement, and four  
54  
55  
56  
57

1  
2  
3 secondary factors, Problem Engagement, Problem Disengagement, Emotion Engagement, and  
4  
5 Emotion Disengagement. The CSI-SF scale (Cronbach's  $\alpha = 0.95$ ) has high internal consistencies in  
6  
7 the Bhutanese study.<sup>35</sup> Participants were asked to rate their responses on a 5-point Likert-type scale  
8  
9 ranging from *not at all (1)* to *very much (5)*.  
10  
11  
12  
13

### 14 **Coping Self-efficacy**

15  
16 Self-efficacy will be measured using a 26-item Coping Self-efficacy (CSE) scale for coping with  
17  
18 challenges and threats.<sup>39</sup> Each item of the scale will be rated on an 11-point scale Likert-type scale  
19  
20 ranging from *(0) cannot do at all, (5) moderately certain can do, and (10) certain can do*. The scale  
21  
22 has high internal consistency (Cronbach's  $\alpha = 0.96$ ) in the previous Bhutanese study.<sup>35</sup>  
23  
24  
25  
26  
27

### 28 **Social support**

29  
30 Perceived social support will be measured using a 12-item Multidimensional Scale of Perceived  
31  
32 Social Support (MSPSS),<sup>43</sup> including support from friends, family, and significant others. A sample  
33  
34 item for this scale is, "My family tries to help me." Each item of the scale will be rated on a 5-point  
35  
36 Likert-type scale ranging from *strongly disagree (1)* to *strongly agree (5)*. Graded items will be  
37  
38 summed up to provide a total score, and higher scores indicate high social support. The scale has  
39  
40 high internal consistency (Cronbach's  $\alpha = 0.92$ ) in the previous Bhutanese study.<sup>35</sup>  
41  
42  
43  
44  
45

### 46 **Social network**

47  
48 We will use a Lubben Social Network Scale-Revised (LSNS-R) to measure social networks among  
49  
50 family and friendships.<sup>44</sup> It consists of six questions, which assess kinship ties, and a comparable set  
51  
52 of six questions, which determine friend ties by replacing the word relatives with the word friends.  
53  
54  
55  
56  
57

1  
2  
3 We prepared three questions to measure cross-cultural social ties following a similar pattern. The  
4  
5 scale has high internal consistency for kinship ties (Cronbach's  $\alpha = 0.78$ ), friendship ties  
6  
7 (Cronbach's  $\alpha = 0.80$ ), and cross-cultural social ties (Cronbach's  $\alpha = 0.74$ ) in the previous  
8  
9 Bhutanese study.<sup>35</sup> These items will be scored on a five-point Likert scale ranging from *none (0)* to  
10  
11 *9 or more or always (5)*.  
12  
13

### 14 15 16 17 **Family conflict resolution**

18  
19 Family conflict resolution, including positive or negative resolution, effective communication, and  
20  
21 discussion of differences, will be measured using a 17-item version of the "Family Conflict  
22  
23 Resolution" scale.<sup>41</sup> This scale has high internal consistency (Cronbach's  $\alpha = 0.90$ ) in the previous  
24  
25 Bhutanese study.<sup>35</sup> Participants will be asked to respond on a 7-point Likert-type scale, ranging  
26  
27 from *never (1)* to *always (7)*.  
28  
29

30  
31  
32  
33 **Family satisfaction:** Family satisfaction with various aspects of family functioning, including  
34  
35 family closeness, flexibility, and communication, will be measured using a 10-item family  
36  
37 satisfaction scale.<sup>55</sup> Participants will be asked to respond on a 5-point Likert-type scale, ranging  
38  
39 from *very dissatisfied (1)* to *extremely satisfied (5)*.  
40  
41  
42  
43

### 44 45 **Data management**

46  
47 All interviews will be conducted with the utmost privacy and confidentiality. Each interested and  
48  
49 eligible adult participant in the family will be interviewed individually, in a private place where  
50  
51 they feel comfortable, by our trained community RAs. The RAs will ensure audio and visual  
52  
53 privacy at these sites, and ensure data confidentiality. RAs will reassure participants that numerical  
54  
55  
56  
57

1  
2  
3 codes would be used in place of names in all records to ensure confidentiality. The survey materials  
4  
5 (questionnaires, transcriptions, and field notes) will be stored in a locked cabinet in the PI's office.  
6  
7 Data entry will be done on the PI's office computer (encrypted and password protected) under the  
8  
9 full supervision of the PI. The original data will be kept on OneDrive, a secure, networked  
10  
11 university data storage system. De-identified data sets will be used for statistical analyses. The PI  
12  
13 herself will do data analysis and documentation. All information will be presented in aggregate  
14  
15 form in the manuscript or conference abstract, and no individual respondent will be identified.  
16  
17  
18  
19  
20

## 21 **Data analysis**

22  
23 We will compare baseline characteristics of intervention and control groups using chi-square and t-  
24  
25 tests as appropriate. While differences between groups are not expected because of the  
26  
27 randomization used in the study design, variables showing significant differences between the two  
28  
29 groups will be included as covariates in primary analyses. The primary analyses will test whether  
30  
31 participants' outcomes in the PMP-I arm differ from those in the control arm. Multilevel modeling  
32  
33 will compare outcomes of each treatment arm while accounting for the clustering of participants  
34  
35 within families. Continuous outcomes will be analyzed using hierarchical linear modeling, and  
36  
37 dichotomous outcomes will be analyzed using multilevel generalized linear models with a Bernoulli  
38  
39 distribution appropriate to nonlinear binary outcomes.<sup>56</sup>  
40  
41  
42  
43

44 We expect approximately 2 to 4 members for each of the 58 families in each treatment arm, and  
45  
46 the correlation among family members' responses will be accounted for in the model. Hierarchical  
47  
48 or multilevel modeling is suited to these data as it accounts for the clustering of members within  
49  
50 families and unbalanced designs (i.e., different family sizes).<sup>56</sup> This will be an intention-to-treat  
51  
52 type of analysis, as multilevel modeling allows retention of all participants irrespective of the  
53  
54  
55  
56  
57

1  
2  
3 number of sessions attended (multilevel modeling uses maximum likelihood estimation, one of the  
4 recommended ways of handling missing data). The analysis will estimate endpoint outcomes based  
5  
6 on repeated measures (Level 1) within individuals (Level 2) within families (Level 3). Separate  
7  
8 models will be created to evaluate the relationships between mediators (targets) and outcomes and  
9  
10 explore mediators (e.g., coping) of intervention-outcome relation. All analyses will be performed  
11  
12 using SAS, version 9 (SAS Institute Inc, Cary, NC).  
13  
14  
15  
16  
17  
18

### 19 **Independent Safety Monitor**

20  
21 We will select an Independent Safety Monitor (ISM) with mental health expertise, whose primary  
22 responsibility is to provide independent monitoring of this clinical trial in a timely fashion. Overall,  
23  
24 the ISM will review enrollment data, safety data, and data integrity to maintain safety in the trial.  
25  
26 The PI will submit data reports once a year to the ISM. The report will include the key variables  
27  
28 necessary for monitoring the safety and quality of data collection and the integrity of the study,  
29  
30 including inclusion criteria, informed consent, subject enrollment and retention, data  
31  
32 confidentiality, intervention compliance, dropouts, adverse events, protocol compliance, data  
33  
34 quality, and baseline characteristics of study participants. The ISM will have access to all safety and  
35  
36 data quality information collected and will have the authority to stop the study if it is determined  
37  
38 that there are unacceptable risks to participants. The ISM also will review the study protocol,  
39  
40 informed consent, and all relevant documents before the onset of the study and will review and  
41  
42 approve amendments to these documents. The ISM will issue a monitoring report to the PI  
43  
44 following each review. The PI will submit all review reports to the UMass Amherst IRB and NIMH  
45  
46 Program Officer in annual progress reports.  
47  
48  
49  
50  
51  
52

### 53 **Trial management**

1  
2  
3 The PI will assume overall responsibility of trial management, working together with the entire  
4 research team throughout the project, meeting monthly with Co-Investigators (psychiatrist,  
5 cognitive behavior therapist, and epidemiologist), and once every week with field staff (supervisors,  
6 interventionists, and research assistants) via in-person or zoom or text message as needed. During  
7 the trial, experienced field supervisors from the Bhutanese community, who are trained as a  
8 community health workers and have worked with the PI in previous family-based mental health  
9 intervention studies with depressive and suicidal ideation outcomes, will take responsibility for the  
10 day-to-day oversight of the participants and field teams in the implementation of the trial. Field  
11 supervisors will immediately report any noted adverse events among participants to the PI. The PI  
12 will report adverse events data to the Independent Safety Monitor (ISM), UMass Amherst IRB, and  
13 National Institute of Mental Health (NIMH) Program Officer following NIMH guidelines for  
14 reportable events, as described below.  
15  
16  
17  
18  
19  
20  
21  
22  
23  
24  
25  
26  
27  
28  
29  
30  
31  
32

### 33 **Adverse events reporting**

34  
35 Throughout the study period, all study participants will be monitored daily by the field supervisors  
36 under the PI's supervision. Field supervisors will request study participants and their family  
37 members to immediately report any unanticipated serious adverse events in their family, such as 1)  
38 reporting suicidal ideation or attempts, hospitalization, disability, and/or death; 2) discomfort with  
39 the PMP-I program content and/or evaluation procedures, and 3) risk of a breach of confidentiality,  
40 of the collected data and/or by program personnel to field supervisor or PI directly. Field  
41 supervisors will immediately report details of such adverse events to PI. The PI will be responsible  
42 for reporting them to the UMass Amherst IRB, ISM, and NIMH Program Officer by secure email  
43 within ten business days of the study team becoming aware of any serious adverse events. The PI  
44  
45  
46  
47  
48  
49  
50  
51  
52  
53  
54  
55  
56  
57  
58  
59  
60

1  
2  
3 will be responsible for summarizing all adverse events that are deemed expected and/or unrelated to  
4 the study in the annual progress report submitted to the UMass Amherst IRB, ISM, and NIMH  
5  
6  
7  
8 Program Officer by secure email.  
9

## 12 **Patient and public involvement**

14 Patients or the public were not involved in the design, or conduct, or reporting, or dissemination  
15  
16 plans of our research.  
17  
18  
19

## 22 **Ethics and dissemination**

24 The Institutional Review Board of the University of Massachusetts Amherst approved this study  
25  
26 (Protocol ID: 1837) and certified that it will be performed according to the ethical standards laid  
27  
28 down in the 1964 Declaration of Helsinki and its later amendments.  
29

31 Before enrolling participants in the study, written informed consent will be taken from each  
32  
33 person after a complete description of the study. All participants will have the opportunity to  
34  
35 discuss any questions or issues (online supplemental file).  
36

37 The study data will be shared via the National Institute of Mental Health Data Archive. Access  
38  
39 to data used in the proposed project will be considered for sharing in compliance with the NIH  
40  
41 Grants Policy on Sharing Unique Research Resources. The study results will be used to inform the  
42  
43 design of a large-scale intervention and will be disseminated in peer-reviewed journals and  
44  
45 conferences.  
46  
47  
48

## 49 **Discussion**

51 This study reports an RCT protocol that tests PMP-I's feasibility, acceptability, and preliminary  
52  
53 outcomes with trained community facilitators. This study is built on prior research that has shown  
54  
55  
56  
57

1  
2  
3 the effectiveness of social and emotional wellbeing intervention, including psychoeducation,  
4 problem-solving, social support, and mind-body exercises, to reduce stress, anxiety, and depressive  
5 symptoms among Bhutanese adults resettled in MA at a group<sup>35</sup> and family settings<sup>36</sup> using a pre-  
6 and post-test intervention design. Our project designed for Bhutanese immigrants includes  
7 evidence-based interventions of specific relevance to this community, such as psychoeducation,<sup>57</sup>  
8 problem-solving,<sup>25</sup> behavioral activations,<sup>26-33</sup> mind-body exercises,<sup>21-24</sup> and strengthening social  
9 support to address identified social (e.g., social isolation, language difficulties) and emotional (e.g.,  
10 lack of self-esteem or self-efficacy)<sup>51</sup> stressors by strengthening protective factors (e.g., resilience  
11 or coping).<sup>58, 59</sup> This study is innovative as it will be the first culturally tailored, preventive, family-  
12 based, multi-component behavioral intervention driven by the community to reduce stress. We will  
13 have pilot-tested a preventative mental health intervention for Bhutanese adults upon completion.  
14 This study can be expected to impact reducing stress and promoting immigrants' mental wellbeing.

15  
16  
17  
18  
19  
20  
21  
22  
23  
24  
25  
26  
27  
28  
29  
30  
31 Our project is likely to be replicated with other immigrant communities with minimal adaptation  
32 over the long term for three reasons. First, our intervention is guided by a strengths-based approach  
33 in which we plan to include community strengths. This principle can be applied to capture and  
34 integrate the strengths of any community. Second, our program prioritizes the training of  
35 community members as interventionists, as these are individuals whom the community trusts, who  
36 share the same cultural lens as the community and thus can well understand language and specific  
37 challenges, and who have a vested interest in the strength and resilience of their community. This  
38 aspect of our intervention design is easily adaptable to other populations. Finally, intervention is  
39 designed to be delivered in family settings where participants are most comfortable and family  
40 members can support each other throughout their lives. This component is crucial in collectivistic  
41 societies where family bonds and group identity are strong. Thus, our family-based strategies could  
42  
43  
44  
45  
46  
47  
48  
49  
50  
51  
52  
53  
54  
55  
56  
57  
58  
59  
60



1  
2  
3 be replicable in other immigrant groups, where there are similarities in social and emotional  
4 stressors, challenges, community strengths (coping, resilience, social support), strong family  
5 support, and cultural preference of native community counselors for their mental health  
6 consultation. Our strength-based and peer-led strategies promote community engagement and make  
7 the intervention sustainable.<sup>60-62</sup>

8  
9  
10 Although our study design has several strengths, it also has some methodological limitations.  
11 We measured anxiety and depressive symptoms using the HSCL-25 scale, which was validated  
12 with clinical DSM-IV diagnoses of major depressive disorder<sup>63</sup> among refugees in Nepal<sup>64</sup> and  
13 other countries.<sup>65</sup> Although clinical diagnosis is the gold standard; such an approach is not feasible  
14 in community-based studies. We have started implementing an intervention during the COVID-19  
15 pandemic, so we may need to be flexible in the time frame for conducting surveys and  
16 implementing intervention sessions while waiting for participants to recover from COVID-19  
17 infections they might have contracted during the study period.

18  
19  
20 In conclusion, our trial will provide information on the feasibility of PMP-I among the  
21 immigrant population and effect size estimate to design a larger-scale randomized controlled trial  
22 intervention study.

## 23 24 25 **Trial status**

26  
27  
28 Recruitment of participants was delayed due to the COVID-19 pandemic and started on August 17,  
29 2021. At the time of manuscript submission, trial was ongoing. Results of this study are expected in  
30 mid-2024.

## 31 32 33 **List of abbreviations**

1  
2  
3 CBPR: Community-Based Participatory Research; CDC: Centers for Disease Control and  
4 Prevention; CIs: Community Interventionists; CSE: Coping Self-efficacy; CSI-SF: Coping  
5 Strategies Inventory-Short Form; ELISA: Enzyme-Linked Immunosorbent Assay; ES: Effect Size;  
6  
7 FGD: Focus Group Discussion; HSCL-25: Hopkins Symptom Checklist-25; IRB: Institutional  
8 Review Board; ISM: Independent Safety Monitor; LSNS-R: Lubben Social Network Scale-  
9 Revised; MSPSS: Multidimensional Scale of Perceived Social Support; NDA: National Institute of  
10 Mental Health Data Archive; NIMH: National Institute of Mental Health; PHQ-9: Patient Health  
11 Questionnaire; PI: Principal Investigator; PMP: Problem Management Plus; PMP-I: Problem  
12 Management Plus for Immigrants; PSS: Perceived Stress Scale; RAs: Research Assistants; RCT:  
13 Randomized Controlled Trial; SPIRIT: Standard Protocol Items: Recommendations for  
14  
15 Interventional Trials; WHO: World Health Organization  
16  
17  
18  
19  
20  
21  
22  
23  
24  
25  
26  
27  
28  
29  
30

### 31 **Contributors**

32  
33 KPT conceived the study and drafted the study and trial protocols. All authors were involved in the  
34 design of the study; KPT, CSJ, CM, KCP, SR, RR, HL, JSM, ERBJ, and SDH were involved in  
35 revising the study protocol for ethics review, and all authors were involved in commenting on and  
36 revising the trial protocol. All authors read and approved the final manuscript.  
37  
38  
39  
40  
41  
42  
43  
44

### 45 **Competing interests**

46  
47 The author(s) declared no potential conflicts of interest with respect to the research, authorship,  
48 and/or publication of this article.  
49  
50

### 51 **Funding**

1  
2  
3 This trial is funded by the National Institute of Mental Health of the National Institutes of Health  
4  
5 under Award Number R34MH118396 (PI: Dr. Kalpana Poudel-Tandukar). The content is solely the  
6  
7 authors' responsibility and does not necessarily represent the official views of the National Institutes  
8  
9 of Health.  
10

### 11 **Consent for publication**

12  
13  
14 Not applicable.  
15  
16

### 17 **FIGURE TITLES**

#### 18 **Figure 1. Study flowchart**

19  
20  
21  
22  
23  
24  
25

### 26 **References**

- 27  
28 1. Taylor EM, Yanni EA, Pezzi C, Guterbock M, Rothney E, Harton E, Montour J, Elias C,  
29  
30 Burke H. Physical and mental health status of Iraqi refugees resettled in the United States. *J Immigr*  
31  
32 *Minor Health* 2014;16:1130-7.  
33
- 34  
35 2. Wagner J, Burke G, Kuoch T, Scully M, Armeli S, Rajan TV. Trauma, healthcare access,  
36  
37 and health outcomes among Southeast Asian refugees in Connecticut. *J Immigr Minor Health*  
38  
39 2013;15:1065-72.  
40
- 41  
42 3. Alemi Q, Stempel C. Discrimination and distress among Afghan refugees in northern  
43  
44 California: The moderating role of pre- and post-migration factors. *PLoS One* 2018;13:e0196822.  
45
- 46  
47 4. Ellis BH, Lankau EW, Ao T, Benson MA, Miller AB, Shetty S, Lopes Cardozo B, Geltman  
48  
49 PL, Cochran J. Understanding Bhutanese refugee suicide through the interpersonal-psychological  
50  
51 theory of suicidal behavior. *Am J Orthopsychiatry* 2015;85:43-55.  
52  
53  
54  
55  
56  
57

- 1  
2  
3 5. Vonnahme LA, Lankau EW, Ao T, Shetty S, Cardozo BL. Factors Associated with  
4  
5 Symptoms of Depression Among Bhutanese Refugees in the United States. *J Immigr Minor Health*  
6  
7 2015;17:1705-14.  
8  
9
- 10 6. Williams ME, Thompson SC. The use of community-based interventions in reducing  
11  
12 morbidity from the psychological impact of conflict-related trauma among refugee populations: a  
13  
14 systematic review of the literature. *J Immigr Minor Health* 2011;13:780-94.  
15  
16
- 17 7. Ellis BH, Lincoln AK, Charney ME, Ford-Paz R, Benson M, Strunin L. Mental health  
18  
19 service utilization of Somali adolescents: religion, community, and school as gateways to healing.  
20  
21 *Transcult Psychiatry* 2010;47:789-811.  
22  
23
- 24 8. Colucci E, Szware J, Minas H, Paxton G, Guerra C. The utilization of mental health services  
25  
26 by children and young people from a refugee background: A systematic literature review.  
27  
28 *International Journal of Culture and Mental Health* 2012;7:86-108.  
29  
30
- 31 9. Swinson Evans T, Berkman N, Brown C, Gaynes B, Palmieri Weber R. Disparities within  
32  
33 serious mental illness. Technical Brief No. 25. (Prepared by the RTI International–University of  
34  
35 North Carolina Evidence-based Practice Center under Contract No. 290-2015-00011-I). AHRQ  
36  
37 Publication No.16-EHC027-EF. Rockville, MD: Agency for Healthcare Research and Quality; May  
38  
39 2016. , 2016.  
40  
41
- 42 10. Goodkind JR, Hess JM, Isakson B, LaNoue M, Githinji A, Roche N, Vadnais K, Parker DP.  
43  
44 Reducing refugee mental health disparities: a community-based intervention to address  
45  
46 postmigration stressors with African adults. *Psychol Serv* 2014;11:333-46.  
47  
48
- 49 11. Weine SM. Developing preventive mental health interventions for refugee families in  
50  
51 resettlement. *Fam Process* 2011;50:410-30.  
52  
53  
54  
55  
56  
57  
58  
59  
60

- 1  
2  
3 12. Kirmayer LJ, Narasiah L, Munoz M, Rashid M, Ryder AG, Guzder J, Hassan G, Rousseau  
4 C, Pottie K. Common mental health problems in immigrants and refugees: general approach in  
5  
6 primary care. *CMAJ* 2011;183:E959-67.  
7  
8
- 9  
10 13. Pumariega AJ, Rothe E, Pumariega JB. Mental health of immigrants and refugees.  
11  
12 *Community Ment Health J* 2005;41:581-97.  
13
- 14  
15 14. Peterson C, Poudel-Tandukar K, Sanger K, Jacelon CS. Improving Mental Health in  
16  
17 Refugee Populations: A Review of Intervention Studies Conducted in the United States. *Issues*  
18  
19 *Ment Health Nurs* 2020;41:271-82.  
20
- 21  
22 15. Im H, Rosenberg R. Building Social Capital Through a Peer-Led Community Health  
23  
24 Workshop: A Pilot with the Bhutanese Refugee Community. *J Community Health* 2016;41:509-17.  
25
- 26  
27 16. Birman D, Beehler S, Harris EM, Everson ML, Batia K, Liautaud J, Frazier S, Atkins M,  
28  
29 Blanton S, Buwalda J, Fogg L, Cappella E. International Family, Adult, and Child Enhancement  
30  
31 Services (FACES): a community-based comprehensive services model for refugee children in  
32  
33 resettlement. *Am J Orthopsychiatry* 2008;78:121-32.  
34
- 35  
36 17. Boehnlein JK, Kinzie JD, Sekiya U, Riley C, Pou K, Rosborough B. A ten-year treatment  
37  
38 outcome study of traumatized Cambodian refugees. *J Nerv Ment Dis* 2004;192:658-63.  
39
- 40  
41 18. CDC. Suicide and suicidal ideation among Bhutanese refugees--United States, 2009-2012.  
42  
43 *MMWR Morb Mortal Wkly Rep* 2013;62:533-6.  
44
- 45  
46 19. Dawson KS, Bryant RA, Harper M, Kuowei Tay A, Rahman A, Schafer A, van Ommeren  
47  
48 M. Problem Management Plus (PM+): a WHO transdiagnostic psychological intervention for  
49  
50 common mental health problems. *World Psychiatry* 2015;14:354-7.  
51  
52  
53  
54  
55  
56  
57

1  
2  
3  
4  
5  
6  
7  
8  
9  
10  
11  
12  
13  
14  
15  
16  
17  
18  
19  
20  
21  
22  
23  
24  
25  
26  
27  
28  
29  
30  
31  
32  
33  
34  
35  
36  
37  
38  
39  
40  
41  
42  
43  
44  
45  
46  
47  
48  
49  
50  
51  
52  
53  
54  
55  
56  
57  
58  
59  
60

20. World Health Organization. Problem Management Plus (PM+): Individual psychological help for adults impaired by distress in communities exposed to adversity. (Generic field-trial version 1.0). Geneva, WHO, 2016.
21. Wahbeh H, Elsas SM, Oken BS. Mind-body interventions: applications in neurology. *Neurology* 2008;70:2321-8.
22. Falsafi N. A Randomized Controlled Trial of Mindfulness Versus Yoga: Effects on Depression and/or Anxiety in College Students. *J Am Psychiatr Nurses Assoc* 2016;22:483-97.
23. Prathikanti S, Rivera R, Cochran A, Tungol JG, Fayazmanesh N, Weinmann E. Treating major depression with yoga: A prospective, randomized, controlled pilot trial. *PLoS One* 2017;12:e0173869.
24. de Manincor M, Bensoussan A, Smith C, Fahey P, Bouchier S. Establishing key components of yoga interventions for reducing depression and anxiety, and improving well-being: a Delphi method study. *BMC Complement Altern Med* 2015;15:85.
25. Cuijpers P, de Wit L, Kleiboer A, Karyotaki E, Ebert DD. Problem-solving therapy for adult depression: An updated meta-analysis. *Eur Psychiatry* 2018;48:27-37.
26. Martell CR, Dimidjian S, Hermann-Dunn R. Behavioral activation for depression: a clinician's guide. Gullford New York, NY.; 2010.
27. Mazzucchelli T, R. K, Rees C. Behavioral activation treatments for depression in adults: a meta-analysis and review. *Clin Psychol Sci Pract* 2009;16:383-411.
28. Kanter JW, Manos RC, Bowe WM, Baruch DE, Busch AM, Rusch LC. What is behavioral activation? A review of the empirical literature. *Clin Psychol Rev* 2010;30:608-20.
29. Cuijpers P, van Straten A, Warmerdam L. Behavioral activation treatments of depression: a meta-analysis. *Clin Psychol Rev* 2007;27:318-26.

- 1  
2  
3 30. Cuijpers P, van Straten A, Warmerdam L. Problem solving therapies for depression: a meta-  
4 analysis. *Eur Psychiatry* 2007;22:9-15.  
5  
6  
7 31. Kanter JW, Bush AM, Rusch LC. Behavioural activation: the CBT distinctive feature series.  
8 New York: Routledge.; 2009.  
9  
10  
11 32. Veale D. Behavioural activation for depression. *Adv Psychiatr Treat* 2008;14:29-36.  
12  
13 33. Chowdhary N, Anand A, Dimidjian S, Shinde S, Weobong B, Balaji M, Hollon SD,  
14 Rahman A, Wilson GT, Verdelli H, Araya R, King M, Jordans MJ, Fairburn C, Kirkwood B, Patel  
15 V. The Healthy Activity Program lay counsellor delivered treatment for severe depression in India:  
16 systematic development and randomised evaluation. *Br J Psychiatry* 2015;208:381-8.  
17  
18 34. Khan MN, Hamdani SU, Chiumento A, Dawson K, Bryant RA, Sijbrandij M, Nazir H,  
19 Akhtar P, Masood A, Wang D, Wang E, Uddin I, Ommeren MV, Rahman A. Evaluating feasibility  
20 and acceptability of a group WHO trans-diagnostic intervention for women with common mental  
21 disorders in rural Pakistan: a cluster randomised controlled feasibility trial. *Epidemiol Psychiatr Sci*  
22 2017:1-11.  
23  
24 35. Poudel-Tandukar K, Jacelon CS, Rai S, Ramdam P, Bertone-Johnson ER, Hollon SD. Social  
25 and Emotional Wellbeing (SEW) Intervention for Mental Health Promotion Among Resettled  
26 Bhutanese Adults in Massachusetts. *Community Ment Health J* 2021;57:1318-27.  
27  
28 36. Poudel-Tandukar K, Jacelon CS, Poudel KC, Bertone-Johnson ER, Rai S, Ramdam P,  
29 Hollon SD. Mental health promotion among resettled Bhutanese adults in Massachusetts: Results of  
30 a peer-led family-centred Social and Emotional Well-being (SEW) intervention study. *Health Soc*  
31 *Care Community* 2021.  
32  
33 37. Cohen S, Kamarck T, Mermelstein R. A global measure of perceived stress. *J Health Soc*  
34 *Behav* 1983;24:385-96.  
35  
36  
37  
38  
39  
40  
41  
42  
43  
44  
45  
46  
47  
48  
49  
50  
51  
52  
53  
54  
55  
56  
57  
58  
59  
60

1  
2  
3  
4  
5  
6  
7  
8  
9  
10  
11  
12  
13  
14  
15  
16  
17  
18  
19  
20  
21  
22  
23  
24  
25  
26  
27  
28  
29  
30  
31  
32  
33  
34  
35  
36  
37  
38  
39  
40  
41  
42  
43  
44  
45  
46  
47  
48  
49  
50  
51  
52  
53  
54  
55  
56  
57  
58  
59  
60

38. Derogatis LR, Lipman RS, Rickels K, Uhlenhuth EH, Covi L. The Hopkins Symptom Checklist (HSCL): a self-report symptom inventory. *Behav Sci* 1974;19:1-15.
39. Chesney MA, Neilands TB, Chambers DB, Taylor JM, Folkman S. A validity and reliability study of the coping self-efficacy scale. *Br J Health Psychol* 2006;11:421-37.
40. Tobin DL. *Coping strategies therapy for bulimia nervosa*. Washington, DC: American Psychological Association Press, 2000., 2000.
41. Roskos PT, Handal PJ, Ubinger ME. Family Conflict Resolution: Its Measurement and Relationship with Family Conflict and Psychological Adjustment. *Psychology* 2010;1:370-76.
42. Olson DH. *Family Satisfaction Scale*. Minneapolis, MN: Life Innovations, Inc.; 2010.
43. Zimet GD, Dahlem NW, Zimet SG, Farley GK. The multidimensional scale of perceived social support. *Journal of Personality Assessment* 1988;52:30-41.
44. Lubben J, Blozik E, Gillmann G, Iliffe S, von Renteln Kruse W, Beck JC, Stuck AE. Performance of an abbreviated version of the Lubben Social Network Scale among three European community-dwelling older adult populations. *Gerontologist* 2006;46:503-13.
45. United States Embassy Kathmandu. U.S. Ambassador Bids Farewell to 90,000th Refugee to Resettle to the United States. 21 September, 2016. Accessed July 24, 2017. From: <https://np.usembassy.gov/u-s-ambassador-bids-farewell-90000th-refugee-resettle-united-states/> 2016.
46. Poudel-Tandukar K, Bertone-Johnson ER, KC P, Poudel KC. Family-engaged preventative behavioral interventions are needed to promote mental health among HIV-infected individuals living in resource-poor settings. American Public Health Association Annual Meeting and Exposition (APHA), Philadelphia, USA. November 2-6, 2019. (Abstract Number: 438575): Oral Presentation. 2019.



- 1  
2  
3 47. Slobodin O, de Jong JT. Family interventions in traumatized immigrants and refugees: A  
4 systematic review. *Transcult Psychiatry* 2015;52:723-42.  
5  
6  
7 48. Kraemer HC, Mintz J, Noda A, Tinklenberg J, Yesavage JA. Caution regarding the use of  
8 pilot studies to guide power calculations for study proposals. *Arch Gen Psychiatry* 2006;63:484-9.  
9  
10  
11 49. Raudenbush, S. W., et al. (2011). Optimal Design Software for Multi-level and Longitudinal  
12 Research (Version 3.01) [Software]. Available from [www.wtgrantfoundation.org](http://www.wtgrantfoundation.org).  
13  
14  
15 50. World Health Organization. Problem Management Plus (PM+) Training Guide for PM+  
16 Helpers: To accompany the PM+ intervention manual: Problem Management Plus: Individual  
17 psychological help for adults impaired by distress in communities exposed to adversity –Field  
18 Version 1.0 WHO (2016). Series on Low-Intensity Psychological Interventions – 2. Geneva, WHO,  
19 2018. .  
20  
21  
22 51. Poudel-Tandukar K, Jacelon CS, Chandler GE, Gautam B, Palmer PH. Sociocultural  
23 Perceptions and Enablers to Seeking Mental Health Support Among Bhutanese Refugees in  
24 Western Massachusetts. *Int Q Community Health Educ* 2019;39:135-45.  
25  
26  
27 52. Green J, Thorogood N. Qualitative methods for health research. Thousands Oaks, CA, USA:  
28 SAGE Publishing; 2014. 2014.  
29  
30  
31 53. Meyer J, Novak M, Hamel A, Rosenberg K. Extraction and analysis of cortisol from human  
32 and monkey hair. *J Vis Exp* 2014:e50882.  
33  
34  
35 54. Meyer JS, Novak MA. Minireview: Hair cortisol: a novel biomarker of hypothalamic-  
36 pituitary-adrenocortical activity. *Endocrinology* 2012;153:4120-7.  
37  
38  
39 55. Olson DH, Wilson M. Family Satisfaction. In Olson, D.H., and colleagues. *Families: What  
40 Makes Them Work*. Newbury Park, CA: Sage Publishing.; 1982, 1989.  
41  
42  
43  
44  
45  
46  
47  
48  
49  
50  
51  
52  
53  
54  
55  
56  
57  
58  
59  
60

1  
2  
3  
4  
5  
6  
7  
8  
9  
10  
11  
12  
13  
14  
15  
16  
17  
18  
19  
20  
21  
22  
23  
24  
25  
26  
27  
28  
29  
30  
31  
32  
33  
34  
35  
36  
37  
38  
39  
40  
41  
42  
43  
44  
45  
46  
47  
48  
49  
50  
51  
52  
53  
54  
55  
56  
57  
58  
59  
60

56. Raudenbush S, W., Bryk. AS. Hierarchical Linear Models: Applications and Data Analysis Methods. 2nd ed. Thousand Oaks: Sage Publications. 2002.
57. Zlotnick C, Johnson SL, Miller IW, Pearlstein T, Howard M. Postpartum depression in women receiving public assistance: pilot study of an interpersonal-therapy-oriented group intervention. *Am J Psychiatry* 2001;158:638-40.
58. Poudel-Tandukar K, Jacelon CS, Bertone-Johnson ER, Gautam B, Palmer PH, Hollon SD. Coping strategies and stress among resettled Bhutanese adults in Massachusetts. *Am J Orthopsychiatry* 2020;90:502-09.
59. Poudel-Tandukar K, Chandler GE, Jacelon CS, Gautam B, Bertone-Johnson ER, Hollon SD. Resilience and anxiety or depression among resettled Bhutanese adults in the United States. *Int J Soc Psychiatry* 2019:20764019862312.
60. Singla DR, Kohrt BA, Murray LK, Anand A, Chorpita BF, Patel V. Psychological Treatments for the World: Lessons from Low- and Middle-Income Countries. *Annu Rev Clin Psychol* 2017;13:149-81.
61. Webel AR, Okonsky J, Trompeta J, Holzemer WL. A systematic review of the effectiveness of peer-based interventions on health-related behaviors in adults. *Am J Public Health* 2010;100:247-53.
62. Petosa R, Smith LH. Peer mentoring for health behaviors change: A systematic review. . *Am J Health Educ* 2014;45:351-57.
63. APA. *Diagnostic and statistical manual of mental disorder*, 4th ed. DSM-IV. 1994 APA. <https://doi.org/10.1146/annur-ev-clinpsy-032816-045217>
64. Shrestha NM, Sharma B, Van Ommeren M, Regmi S, Makaju R, Komproe I, Shrestha GB, de Jong JTVM. Impact of torture on refugees displaced within the developing world:

1  
2  
3 Symptomatology among Bhutanese refugees in Nepal. JAMA 1998;280:443–448.

4  
5 <https://doi.org/10.1001/jama.280.5.443>

6  
7  
8 65. Hollifield M, Warner TD, Lian N, Krakow B, Jenkins JH, Kesler J, Stevenson J,  
9  
10 Westermeyer J. Measuring trauma and health status in refugees: A critical review. JAMA 2002;288,  
11  
12 611–621. <https://doi.org/10.1001/jama.288.5.611>.

13  
14  
15  
16  
17  
18  
19  
20  
21  
22  
23  
24  
25  
26  
27  
28  
29  
30  
31  
32  
33  
34  
35  
36  
37  
38  
39  
40  
41  
42  
43  
44  
45  
46  
47  
48  
49  
50  
51  
52  
53  
54  
55  
56  
57  
58  
59  
60

For peer review only

Table 1. Overview of study measures

| <i>Assessment</i>                                                  | <i>Screening Visit 1</i> | <i>Baseline, Enrollment Randomization: Visit 1</i> | <i>Intervention Session 1 Visit 2</i> | <i>Intervention Session 2 Visit 3</i> | <i>Intervention Session 3 Visit 4</i> | <i>Intervention Session 4 Visit 5</i> | <i>Intervention Session 5 Visit 6</i> | <i>Post-intervention Visit 7</i> | <i>3-month Follow-up Final Visit</i> |
|--------------------------------------------------------------------|--------------------------|----------------------------------------------------|---------------------------------------|---------------------------------------|---------------------------------------|---------------------------------------|---------------------------------------|----------------------------------|--------------------------------------|
| <i>Informed Consent Form</i>                                       | <i>X</i>                 |                                                    |                                       |                                       |                                       |                                       |                                       |                                  |                                      |
| <i>Screening tool</i>                                              | <i>X</i>                 |                                                    |                                       |                                       |                                       |                                       |                                       |                                  |                                      |
| <i>Inclusion/Exclusion Criteria</i>                                | <i>X</i>                 |                                                    |                                       |                                       |                                       |                                       |                                       |                                  |                                      |
| <i>Demographics</i>                                                |                          | <i>X</i>                                           |                                       |                                       |                                       |                                       |                                       | <i>X</i>                         | <i>X</i>                             |
| <i>Blood pressure</i>                                              |                          | <i>X</i>                                           |                                       |                                       |                                       |                                       |                                       | <i>X</i>                         | <i>X</i>                             |
| <i>Bodyweight &amp; height</i>                                     |                          | <i>X</i>                                           |                                       |                                       |                                       |                                       |                                       | <i>X</i>                         | <i>X</i>                             |
| <i>Waist circumference</i>                                         |                          | <i>X</i>                                           |                                       |                                       |                                       |                                       |                                       | <i>X</i>                         | <i>X</i>                             |
| <i>Hair samples</i>                                                |                          | <i>X</i>                                           |                                       |                                       |                                       |                                       |                                       |                                  | <i>X</i>                             |
| <i>Stress, Anxiety &amp; Depression</i>                            |                          | <i>X</i>                                           |                                       |                                       |                                       |                                       |                                       | <i>X</i>                         | <i>X</i>                             |
| <i>Family &amp; Social Support</i>                                 |                          | <i>X</i>                                           |                                       |                                       |                                       |                                       |                                       | <i>X</i>                         | <i>X</i>                             |
| <i>Coping Strategies</i>                                           |                          | <i>X</i>                                           |                                       |                                       |                                       |                                       |                                       | <i>X</i>                         | <i>X</i>                             |
| <i>Self-efficacy</i>                                               |                          | <i>X</i>                                           |                                       |                                       |                                       |                                       |                                       | <i>X</i>                         | <i>X</i>                             |
| <i>Family Conflict Resolution</i>                                  |                          | <i>X</i>                                           |                                       |                                       |                                       |                                       |                                       | <i>X</i>                         | <i>X</i>                             |
| <i>Family Satisfaction</i>                                         |                          | <i>X</i>                                           |                                       |                                       |                                       |                                       |                                       |                                  |                                      |
| <i>Enrollment/Randomization</i>                                    |                          | <i>X</i>                                           |                                       |                                       |                                       |                                       |                                       |                                  |                                      |
| <i>Intervention Session and its assessment using fidelity form</i> |                          |                                                    | <i>X</i>                              | <i>X</i>                              | <i>X</i>                              | <i>X</i>                              | <i>X</i>                              |                                  |                                      |
| <i>Adverse Events</i>                                              |                          | <i>X</i>                                           | <i>X</i>                              | <i>X</i>                              | <i>X</i>                              | <i>X</i>                              | <i>X</i>                              | <i>X</i>                         | <i>X</i>                             |

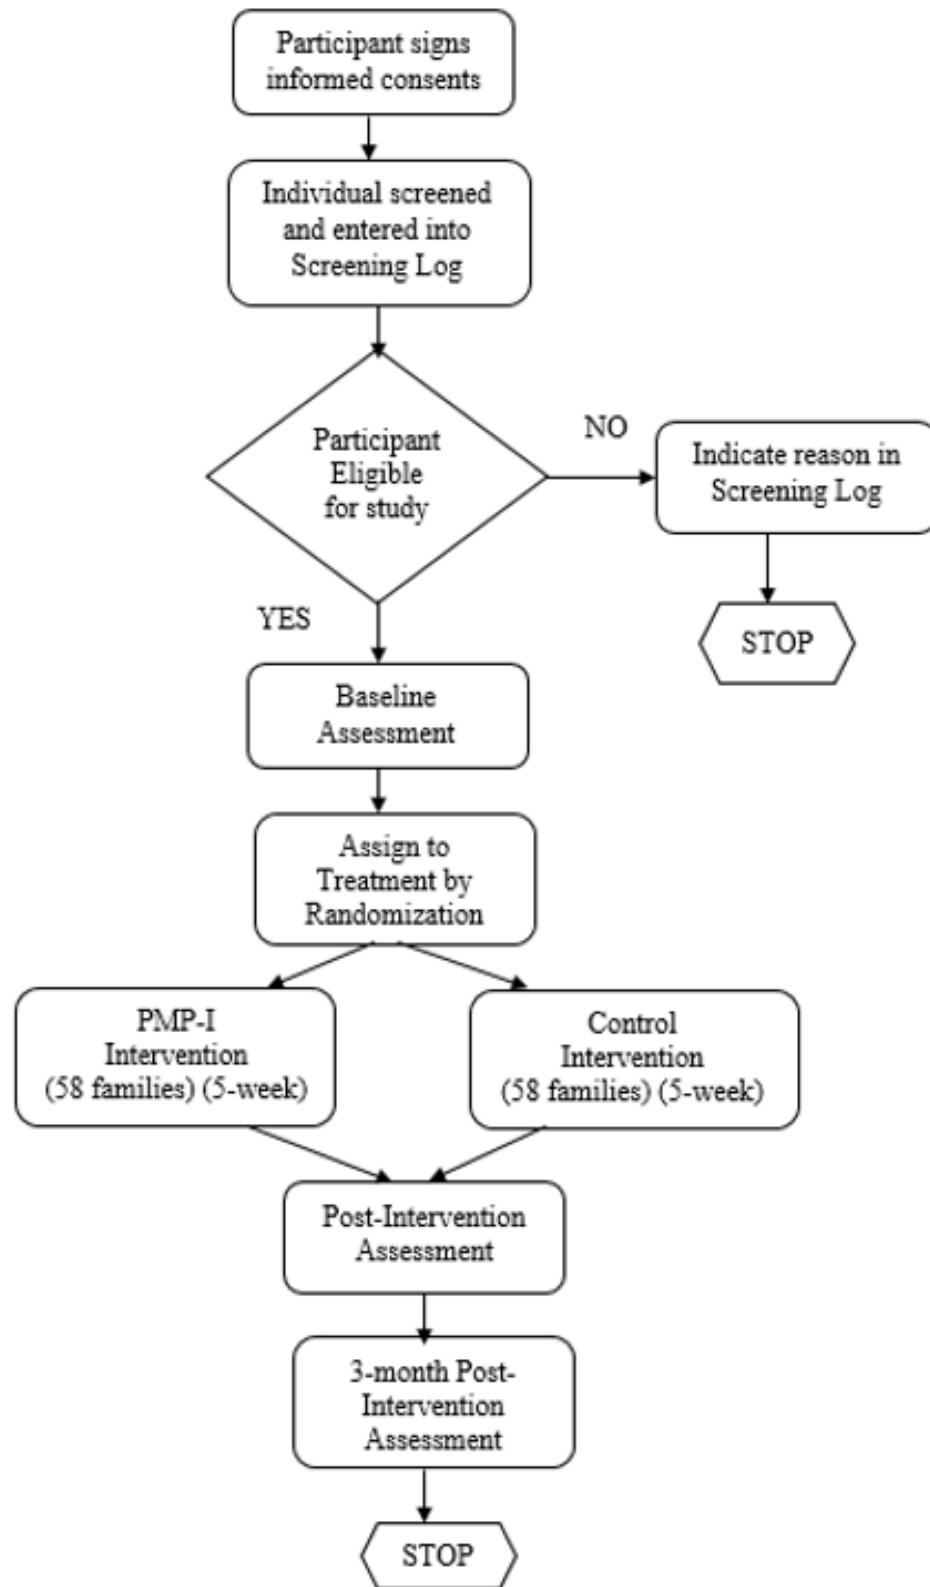

Figure 1 Flowchart of the study

Consent Form for Participation in a Research Study  
University of Massachusetts Amherst

---

**Researcher(s):** Kalpana Poudel-Tandukar, Assistant Professor, College of Nursing  
**Study Title:** Reducing stress, anxiety, and depressive symptoms via a family-centered preventative intervention for immigrants: A randomized controlled feasibility trial  
**Study Funder:** National Institute of Mental Health, National Institutes of Health

---

### 1. WHAT IS THIS FORM?

“This form is called a Consent Form. It will give you information about the study so you can make an informed decision about participation in this research. We encourage you to take some time to think this over and ask questions now and at any other time. If you decide to participate, you will be asked to sign this form and you will be given a copy for your records.”

### 2. WHAT ARE SOME OF THE IMPORTANT ASPECTS OF THIS RESEARCH STUDY THAT I SHOULD BE AWARE OF?

This study plans to implement mental health promotion program among Bhutanese adults resettled in Massachusetts through trained community interventionists in collaboration with church leaders. The overall objective of this study is to assess preliminary effect of a family-centered mental health promotion program (Problem Management Plus for Immigrants: PMP-I) to improve coping, family wellbeing, and social networking that would be helpful to reduce stress, anxiety, and depressive symptoms among Bhutanese adults resettled in Massachusetts. We will determine your eligibility by asking questions of Patient Health Questionnaire-9 (PHQ-9), a screening tool for depression. You are eligible to participate in this study as a primary study participant if your PHQ-9 score is 14 or below. If you are eligible and interested, we will take an informed consent prior to take about an hour interview before, after, and 3-month after program. We will request you to attend about 2-3 hours mental health promotion program each week for 5-week. You will be randomly assign into one of our program, PMP-I program or talk program using a community support service pamphlet. If you are assigned to talk program now, we will provide you PMP-I program after completion of 3-month follow up survey. You do not need to answer the questions, which you do not feel comfortable. Your information will be kept confidential and will not be documented with your name. Please find risks and benefits of study and other important details in the rest of the consent document.

### 3. WHY ARE WE DOING THIS RESEARCH STUDY?

Existing mental health interventions for immigrants are largely based on treatment models to improve the access and quality of care for those with diagnosed mental health problems, however culturally-tailored preventative behavioral interventions aimed at reducing stress and preventing mental health problems among immigrants are limited. Thus, we aim to develop, implement, and pilot test the preventive behavior intervention driven by community members to reduce stress and prevent mental health problems among immigrants.

### 4. WHO CAN PARTICIPATE IN THIS RESEARCH STUDY?

Bhutanese adult aged 18 years or older living in the Massachusetts with a score 14 or below on the Patient Health Questionnaire (PHQ-9) and are willing to participate in the study voluntarily will be requested to participate in the study as primary study participants. This includes parents and their adult children aged 18 and above. Bhutanese adults with PHQ-9 scores 15 or above or with clinically diagnosed mental disorders or taking psychiatric medications for any mental health problems will not be eligible to participate in this study as a primary study participant. However, all interested adult family members both

#### IRB OFFICE USE ONLY

University of Massachusetts Amherst-IRB

Protocol #: 1837

IRB Signature: *Nancy C. Swett*

1 parents and their adult children, regardless of PHQ-9 score and mental health status, will be encouraged to  
2 participate in our mental health promotion intervention at family settings.  
3

#### 4 **5. WHERE WILL THIS RESEARCH STUDY TAKE PLACE AND HOW MANY PEOPLE** 5 **WILL PARTICIPATE?** 6

7 This study will be conducted among Bhutanese adults resettled in the Massachusetts at their family  
8 settings. We plan to enroll 232 participants from 116 families in this study. The entire study is expected to  
9 complete in three year time period.  
10

#### 11 **6. WHAT WILL I BE ASKED TO DO AND HOW MUCH TIME WILL IT TAKE?**

12 If you agree to take part in this study, we will take your 5-minutes time asking short questions of Patient  
13 Health Questionnaire, which is a screening tool for depression. If you are eligible to participate in this  
14 study, we will take your informed consent first. Then, we will take about 45 to 60 minutes of your time  
15 for questionnaire survey before and after program and 3-month after program (thrice). The questionnaire  
16 consists of questions related to socio-demographic information, depression, perceived stress, family  
17 satisfaction, coping behavior, family/social support, family wellbeing, social network, sleep quality, and  
18 health information and program assessment information. We will also measure your body weight, height,  
19 waist circumference, and blood pressure. We will also take your 3-cm hair sample before and 3-month  
20 after program (twice). We request you not to write your name in the questionnaire. You may skip any  
21 question you feel uncomfortable answering. We will also take about two to three hours of your time to  
22 attend mental health promotion program each week for 5-week.  
23

#### 24 **7. WILL BEING IN THIS RESEARCH STUDY HELP ME IN ANY WAY?**

25 You may not directly benefit from this research; however, we hope that your participation in the study  
26 may find useful learning about mental health promotion activities.  
27

#### 28 **8. WHAT ARE MY RISKS OF BEING IN THIS RESEARCH STUDY?**

29 We believe there are minimal risks associated with this research study; however, a risk of breach of  
30 confidentiality always exists and we have taken the steps to minimize this risk as outlined in section 9  
31 below. Some of the questions that we ask may put you in trouble or you may hesitate to answer, for  
32 example, questions on suicidal intention. You are free to skip such questions or also withdraw yourself  
33 from participating the whole study. As researchers, we are not qualified to provide counselling services  
34 and we will not be following up with you after this study. If you feel upset during the study, or find that  
35 some questions or aspects of the study triggered distress, you may contact the PI. The PI will assist you  
36 (in your native Nepali language) and help you to connect with mental health support services in  
37 coordination with the field supervisor. You may want to contact your counsellor at nearby health  
38 institutions such as Baystate Medical Center (Phone: 413-794-0000) and Caring Health Center (Phone:  
39 413- 739-1100), Springfield. Field supervisors from community will provide necessary support to you for  
40 setting up your appointment with primary health care providers if needed.  
41  
42

#### 43 **9. HOW WILL MY PERSONAL INFORMATION BE PROTECTED?**

44 Your privacy and confidentiality is important to us. The following procedures will be used to protect the  
45 confidentiality of your study records. All the information collected during the study will remain  
46 confidential. We will conduct survey in a private location, only allowing authorized research team members  
47 to meet with research participants. We will not record your name in the questionnaire. We will assign you  
48 numerical code that would be used in place of your name in all records to ensure confidentiality. We  
49 would like to assure you that your information will be kept confidential and will not be disclosed in your  
50 name in any of our record, report, publications, and presentations. Data will be stored securely in  
51 password protected computer and will be made available only to the PI. The PI will keep all study records,  
52 including any codes to your data, in a password protected computer. All signed consent documents will be  
53  
54

|                                                                                                                                                |
|------------------------------------------------------------------------------------------------------------------------------------------------|
| <p><b>IRB OFFICE USE ONLY</b></p> <p>University of Massachusetts Amherst-IRB<br/>Protocol #: 1837<br/>IRB Signature: <i>Nancy C. Swett</i></p> |
|------------------------------------------------------------------------------------------------------------------------------------------------|

1 stored securely and separately from the research data in the separate locked cabinet. All hardcopies of study  
2 materials will be stored securely in the locked cabinet of PI's office. Research records will be labeled with a  
3 code. A master key that links names and codes will be maintained in a separate and secure location. The  
4 master key and questionnaires will be completely destroyed six years after the close of the study. All  
5 electronic files containing identifiable information will be password protected. Any computer hosting such  
6 files will also have password protection to prevent access by unauthorized users. Only the PI will have access  
7 to the passwords. At the conclusion of this study, we plan to publish the study findings. Information will be  
8 presented in summary format and you will not be identified in any publications or presentations.

9  
10 The hair sample will be stored in a clean dry white envelope with your ID number on top of the  
11 envelope. The hair samples will be stored in the College of Nursing's laboratory during the data  
12 collection process. At the end of survey, the collected hair samples will be sent to the laboratory in UMass  
13 Amherst. Hair samples will be processed in the laboratory for cortisol measurement. If sample remains  
14 after measurement procedure completion, it will be disposed according to the safety rules and regulation  
15 of the laboratory.

16 For this study you will be assigned a global unique identifier (GUID). This GUID is generated as a  
17 subject ID that allows researchers to share raw data such as number or percentage specific to a study  
18 participant without exposing personally identifiable information. The GUID is made up of random alpha-  
19 numeric characters and is NOT generated from personally identifiable information or protected health  
20 information. This identifier will be kept separate from your paper consent file and will be stored in a  
21 password protected electronic file. Descriptive/raw data will be submitted semi-annually. Access to raw  
22 data used in the proposed project will be considered for sharing in compliance with the NIH Grants Policy  
23 on Sharing Unique Research Resources. Any raw data to be released for sharing will not contain  
24 identifiers (such as name, address, birthdate and phone number) of the study participants.

25  
26 During and after the study, we will send deidentified study data to the National Institute of Mental  
27 Health Data Archive (NDA). Experts at the NIH who know how to keep your data safe. The study  
28 researchers will make every attempt to protect your identity. The study data provided to NDA may help  
29 researchers around the world learn more about mental health and how to help others who have problems  
30 with mental health. NIMH will also report to Congress and on its website about the different studies using  
31 NDA data. You will not be contacted directly about the study data you contributed to NDA. You may  
32 decide now or later that you do not want your study data to be added to the NDA. You can still participate  
33 in this research study even if you decide that you do not want your data to be added to the NDA.

34 This research is covered by a Certificate of Confidentiality from the National Institutes of Health. The  
35 researchers with this Certificate may not disclose or use information, documents, or hair samples that may  
36 identify you in any federal, state, or local civil, criminal, administrative, legislative, or other actions.

37 A description of this study will be available on <http://www.ClinicalTrials.gov>. This Web site will not  
38 include information that can identify you. At most, the Website will include a summary of the results,  
39 when they are available. You can search this Web site at any time. The registration number for this study  
40 is NCT04453709.

#### 41 42 **10. WHAT IF THERE IS AN UNEXPECTED FINDING ON TESTS CONDUCTED ON MY** 43 **HAIR SAMPLES?**

44 The investigators for this research project are not licensed or trained diagnosticians or clinicians. The testing  
45 performed in this project is not intended to find abnormalities, and the data collected do not comprise a  
46 diagnostic or clinical study thus we would not be returning/sharing the results of tests that are conducted on  
47 your hair samples.

#### 48 49 **11. WILL MY INFORMATION (HAIR SAMPLES OR PRIVATE INFORMATION) BE USED** 50 **FOR RESEARCH IN THE FUTURE?**

51 Your information or hair samples will not be used or distributed for future research studies even if identifiers  
52 are removed.

|                                                                                                                                                                                                                         |
|-------------------------------------------------------------------------------------------------------------------------------------------------------------------------------------------------------------------------|
| <p>55 <b>IRB OFFICE USE ONLY</b></p> <p>56 <small>University of Massachusetts Amherst-IRB</small></p> <p>57 <small>Protocol #: 1837</small></p> <p>58 <small>IRB Signature: <i>Nancy C. Swift</i></small></p> <p>59</p> |
|-------------------------------------------------------------------------------------------------------------------------------------------------------------------------------------------------------------------------|



1  
2  
3 **12. WILL I BE GIVEN ANY MONEY OR OTHER COMPENSATION FOR BEING IN THIS**  
4 **RESEARCH STUDY?**

5 You will be interviewed about 45 to 60 minutes for three times (before and after program and 3-month  
6 after program). We will provide total \$25 cash for each participant after completion of each survey.

7 After baseline survey: \$25 per individual

8 After post-intervention survey: \$25 per individual

9 After 3-month follow up survey: \$25 per individual

10 After intervention: \$50 per family (\$10 per session)

11 Exercise mat: One per individual  
12

13 **13. WHO CAN I TALK TO IF I HAVE QUESTIONS?**

14 Take as long as you like before you make a decision. We will be happy to answer any question you have  
15 about this study. If you have further questions about this project or if you have a research-related problem,  
16 you may contact the researcher, [Dr. Kalpana Poudel Tandukar; email: [kalpana@umass.edu](mailto:kalpana@umass.edu); Tel: 1-413-545-  
17 5095). If you have any questions concerning your rights as a research subject, you may contact the University  
18 of Massachusetts Amherst Human Research Protection Office (HRPO) at 1-413-545-3428 or  
19 [humansubjects@ora.umass.edu](mailto:humansubjects@ora.umass.edu).  
20

21 **14. WHAT HAPPENS IF I SAY YES, BUT I CHANGE MY MIND LATER?**

22 You do not have to be in this study if you do not want to. If you agree to be in the study, but later change your  
23 mind, you may drop out at any time. There are no penalties or consequences of any kind if you decide that  
24 you do not want to participate. You will be notified of all significant new findings during the course of the  
25 study that may affect your willingness to continue.  
26

27 **15. WHAT IF I AM INJURED?**

28 The University of Massachusetts does not have a program for compensating subjects for injury or  
29 complications related to human subjects research, but the study personnel will assist you in getting  
30 treatment.  
31

32 **16. SUBJECT STATEMENT OF VOLUNTARY CONSENT**

33 When signing this form I am agreeing to voluntarily enter this study. I have had a chance to read this  
34 consent form, and it was explained to me in a language which I use. I have had the opportunity to ask  
35 questions and have received satisfactory answers. I have been informed that I can withdraw at any time. A  
36 copy of this signed Informed Consent Form has been given to me.  
37  
38

39  
40 \_\_\_\_\_  
41 Participant Signature:

42 \_\_\_\_\_  
43 Print Name:

44 \_\_\_\_\_  
45 Date:

46 By signing below I indicate that the participant has read and, to the best of my knowledge, understands  
47 the details contained in this document and has been given a copy.  
48

49 \_\_\_\_\_  
50 Signature of Person  
51 Obtaining Consent

52 \_\_\_\_\_  
53 Print Name:

54 \_\_\_\_\_  
55 Date:

56 **IRB OFFICE USE ONLY**

57 University of Massachusetts Amherst-IRB  
58 Protocol #: 1837  
59 IRB Signature: *Nancy C. Swett*  
60

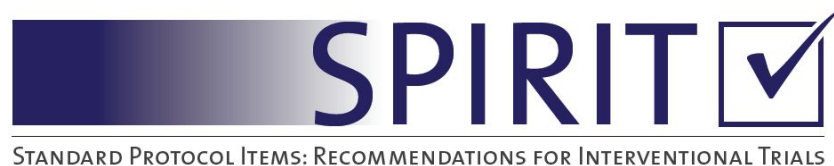

SPIRIT 2013 Checklist: Recommended items to address in a clinical trial protocol and related documents\*

| Section/item                      | Item No | Description                                                                                                                                                                                                                                                                              | Addressed on page number |
|-----------------------------------|---------|------------------------------------------------------------------------------------------------------------------------------------------------------------------------------------------------------------------------------------------------------------------------------------------|--------------------------|
| <b>Administrative information</b> |         |                                                                                                                                                                                                                                                                                          |                          |
| Title                             | 1       | Descriptive title identifying the study design, population, interventions, and, if applicable, trial acronym                                                                                                                                                                             | ___ 1 ___                |
| Trial registration                | 2a      | Trial identifier and registry name. If not yet registered, name of intended registry                                                                                                                                                                                                     | ___ 3 ___                |
|                                   | 2b      | All items from the World Health Organization Trial Registration Data Set                                                                                                                                                                                                                 | ___ NA ___               |
| Protocol version                  | 3       | Date and version identifier                                                                                                                                                                                                                                                              | ___ NA ___               |
| Funding                           | 4       | Sources and types of financial, material, and other support                                                                                                                                                                                                                              | ___ 24-25 ___            |
| Roles and responsibilities        | 5a      | Names, affiliations, and roles of protocol contributors                                                                                                                                                                                                                                  | ___ 25 ___               |
|                                   | 5b      | Name and contact information for the trial sponsor                                                                                                                                                                                                                                       | ___ 24-25 ___            |
|                                   | 5c      | Role of study sponsor and funders, if any, in study design; collection, management, analysis, and interpretation of data; writing of the report; and the decision to submit the report for publication, including whether they will have ultimate authority over any of these activities | ___ 24-25 ___            |
|                                   | 5d      | Composition, roles, and responsibilities of the coordinating centre, steering committee, endpoint adjudication committee, data management team, and other individuals or groups overseeing the trial, if applicable (see Item 21a for data monitoring committee)                         | ___ 19 ___               |

1 **Introduction**

2

3 Background and rationale 6a Description of research question and justification for undertaking the trial, including summary of relevant studies (published and unpublished) examining benefits and harms for each intervention \_\_\_ 5 - 7 \_\_\_

4

5

6 6b Explanation for choice of comparators \_\_\_ 13 \_\_\_

7

8 Objectives 7 Specific objectives or hypotheses \_\_\_ 6 - 7 \_\_\_

9

10 Trial design 8 Description of trial design including type of trial (eg, parallel group, crossover, factorial, single group), allocation ratio, and framework (eg, superiority, equivalence, noninferiority, exploratory) \_\_\_ 7 - 8 \_\_\_

11

12

13

14 **Methods: Participants, interventions, and outcomes**

15

16 Study setting 9 Description of study settings (eg, community clinic, academic hospital) and list of countries where data will be collected. Reference to where list of study sites can be obtained \_\_\_ 7 \_\_\_

17

18

19 Eligibility criteria 10 Inclusion and exclusion criteria for participants. If applicable, eligibility criteria for study centres and individuals who will perform the interventions (eg, surgeons, psychotherapists) \_\_\_ 8 - 9 \_\_\_

20

21

22 Interventions 11a Interventions for each group with sufficient detail to allow replication, including how and when they will be administered \_\_\_ 11 - 13 \_\_\_

23

24

25 11b Criteria for discontinuing or modifying allocated interventions for a given trial participant (eg, drug dose change in response to harms, participant request, or improving/worsening disease) \_\_\_ 19 - 21 \_\_\_

26

27

28 11c Strategies to improve adherence to intervention protocols, and any procedures for monitoring adherence (eg, drug tablet return, laboratory tests) \_\_\_ 19 - 21 \_\_\_

29

30

31 11d Relevant concomitant care and interventions that are permitted or prohibited during the trial \_\_\_ NA \_\_\_

32

33

34 Outcomes 12 Primary, secondary, and other outcomes, including the specific measurement variable (eg, systolic blood pressure), analysis metric (eg, change from baseline, final value, time to event), method of aggregation (eg, median, proportion), and time point for each outcome. Explanation of the clinical relevance of chosen efficacy and harm outcomes is strongly recommended \_\_\_ 13 - 16 \_\_\_

35

36

37

38

39

40 Participant timeline 13 Time schedule of enrolment, interventions (including any run-ins and washouts), assessments, and visits for participants. A schematic diagram is highly recommended (see Figure) \_\_\_ 34 \_\_\_

41

42

43

44

45

46

|    |                                                                     |     |                                                                                                                                                                                                                                                                                                                                                                                                              |                     |
|----|---------------------------------------------------------------------|-----|--------------------------------------------------------------------------------------------------------------------------------------------------------------------------------------------------------------------------------------------------------------------------------------------------------------------------------------------------------------------------------------------------------------|---------------------|
| 1  | Sample size                                                         | 14  | Estimated number of participants needed to achieve study objectives and how it was determined, including clinical and statistical assumptions supporting any sample size calculations                                                                                                                                                                                                                        | ___ 9 - 10 ___      |
| 2  |                                                                     |     |                                                                                                                                                                                                                                                                                                                                                                                                              |                     |
| 3  |                                                                     |     |                                                                                                                                                                                                                                                                                                                                                                                                              |                     |
| 4  | Recruitment                                                         | 15  | Strategies for achieving adequate participant enrolment to reach target sample size                                                                                                                                                                                                                                                                                                                          | ___ 9 - 10 ___      |
| 5  |                                                                     |     |                                                                                                                                                                                                                                                                                                                                                                                                              |                     |
| 6  |                                                                     |     |                                                                                                                                                                                                                                                                                                                                                                                                              |                     |
| 7  | <b>Methods: Assignment of interventions (for controlled trials)</b> |     |                                                                                                                                                                                                                                                                                                                                                                                                              |                     |
| 8  | Allocation:                                                         |     |                                                                                                                                                                                                                                                                                                                                                                                                              |                     |
| 9  |                                                                     |     |                                                                                                                                                                                                                                                                                                                                                                                                              |                     |
| 10 | Sequence generation                                                 | 16a | Method of generating the allocation sequence (eg, computer-generated random numbers), and list of any factors for stratification. To reduce predictability of a random sequence, details of any planned restriction (eg, blocking) should be provided in a separate document that is unavailable to those who enrol participants or assign interventions                                                     | ___ 10 ___          |
| 11 |                                                                     |     |                                                                                                                                                                                                                                                                                                                                                                                                              |                     |
| 12 |                                                                     |     |                                                                                                                                                                                                                                                                                                                                                                                                              |                     |
| 13 |                                                                     |     |                                                                                                                                                                                                                                                                                                                                                                                                              |                     |
| 14 |                                                                     |     |                                                                                                                                                                                                                                                                                                                                                                                                              |                     |
| 15 |                                                                     |     |                                                                                                                                                                                                                                                                                                                                                                                                              |                     |
| 16 | Allocation concealment mechanism                                    | 16b | Mechanism of implementing the allocation sequence (eg, central telephone; sequentially numbered, opaque, sealed envelopes), describing any steps to conceal the sequence until interventions are assigned                                                                                                                                                                                                    | ___ 10 ___          |
| 17 |                                                                     |     |                                                                                                                                                                                                                                                                                                                                                                                                              |                     |
| 18 |                                                                     |     |                                                                                                                                                                                                                                                                                                                                                                                                              |                     |
| 19 |                                                                     |     |                                                                                                                                                                                                                                                                                                                                                                                                              |                     |
| 20 | Implementation                                                      | 16c | Who will generate the allocation sequence, who will enrol participants, and who will assign participants to interventions                                                                                                                                                                                                                                                                                    | ___ 10 ___          |
| 21 |                                                                     |     |                                                                                                                                                                                                                                                                                                                                                                                                              |                     |
| 22 |                                                                     |     |                                                                                                                                                                                                                                                                                                                                                                                                              |                     |
| 23 |                                                                     |     |                                                                                                                                                                                                                                                                                                                                                                                                              |                     |
| 24 | Blinding (masking)                                                  | 17a | Who will be blinded after assignment to interventions (eg, trial participants, care providers, outcome assessors, data analysts), and how                                                                                                                                                                                                                                                                    | ___ 10 ___          |
| 25 |                                                                     |     |                                                                                                                                                                                                                                                                                                                                                                                                              |                     |
| 26 |                                                                     |     |                                                                                                                                                                                                                                                                                                                                                                                                              |                     |
| 27 |                                                                     | 17b | If blinded, circumstances under which unblinding is permissible, and procedure for revealing a participant's allocated intervention during the trial                                                                                                                                                                                                                                                         | ___ NA ___          |
| 28 |                                                                     |     |                                                                                                                                                                                                                                                                                                                                                                                                              |                     |
| 29 |                                                                     |     |                                                                                                                                                                                                                                                                                                                                                                                                              |                     |
| 30 |                                                                     |     |                                                                                                                                                                                                                                                                                                                                                                                                              |                     |
| 31 | <b>Methods: Data collection, management, and analysis</b>           |     |                                                                                                                                                                                                                                                                                                                                                                                                              |                     |
| 32 |                                                                     |     |                                                                                                                                                                                                                                                                                                                                                                                                              |                     |
| 33 | Data collection methods                                             | 18a | Plans for assessment and collection of outcome, baseline, and other trial data, including any related processes to promote data quality (eg, duplicate measurements, training of assessors) and a description of study instruments (eg, questionnaires, laboratory tests) along with their reliability and validity, if known. Reference to where data collection forms can be found, if not in the protocol | ___ 16 - 19 ___     |
| 34 |                                                                     |     |                                                                                                                                                                                                                                                                                                                                                                                                              |                     |
| 35 |                                                                     |     |                                                                                                                                                                                                                                                                                                                                                                                                              |                     |
| 36 |                                                                     |     |                                                                                                                                                                                                                                                                                                                                                                                                              |                     |
| 37 |                                                                     |     |                                                                                                                                                                                                                                                                                                                                                                                                              |                     |
| 38 |                                                                     |     |                                                                                                                                                                                                                                                                                                                                                                                                              |                     |
| 39 |                                                                     | 18b | Plans to promote participant retention and complete follow-up, including list of any outcome data to be collected for participants who discontinue or deviate from intervention protocols                                                                                                                                                                                                                    | ___ 10, 16 - 17 ___ |
| 40 |                                                                     |     |                                                                                                                                                                                                                                                                                                                                                                                                              |                     |
| 41 |                                                                     |     |                                                                                                                                                                                                                                                                                                                                                                                                              |                     |
| 42 |                                                                     |     |                                                                                                                                                                                                                                                                                                                                                                                                              |                     |

|    |                                 |     |                                                                                                                                                                                                                                                                                                                                       |             |
|----|---------------------------------|-----|---------------------------------------------------------------------------------------------------------------------------------------------------------------------------------------------------------------------------------------------------------------------------------------------------------------------------------------|-------------|
| 1  | Data management                 | 19  | Plans for data entry, coding, security, and storage, including any related processes to promote data quality (eg, double data entry; range checks for data values). Reference to where details of data management procedures can be found, if not in the protocol                                                                     | __17 - 18__ |
| 2  |                                 |     |                                                                                                                                                                                                                                                                                                                                       |             |
| 3  |                                 |     |                                                                                                                                                                                                                                                                                                                                       |             |
| 4  |                                 |     |                                                                                                                                                                                                                                                                                                                                       |             |
| 5  | Statistical methods             | 20a | Statistical methods for analysing primary and secondary outcomes. Reference to where other details of the statistical analysis plan can be found, if not in the protocol                                                                                                                                                              | __18 - 19__ |
| 6  |                                 |     |                                                                                                                                                                                                                                                                                                                                       |             |
| 7  |                                 |     |                                                                                                                                                                                                                                                                                                                                       |             |
| 8  |                                 | 20b | Methods for any additional analyses (eg, subgroup and adjusted analyses)                                                                                                                                                                                                                                                              | __18 - 19__ |
| 9  |                                 |     |                                                                                                                                                                                                                                                                                                                                       |             |
| 10 |                                 | 20c | Definition of analysis population relating to protocol non-adherence (eg, as randomised analysis), and any statistical methods to handle missing data (eg, multiple imputation)                                                                                                                                                       | __18 - 19__ |
| 11 |                                 |     |                                                                                                                                                                                                                                                                                                                                       |             |
| 12 |                                 |     |                                                                                                                                                                                                                                                                                                                                       |             |
| 13 |                                 |     |                                                                                                                                                                                                                                                                                                                                       |             |
| 14 | <b>Methods: Monitoring</b>      |     |                                                                                                                                                                                                                                                                                                                                       |             |
| 15 |                                 |     |                                                                                                                                                                                                                                                                                                                                       |             |
| 16 | Data monitoring                 | 21a | Composition of data monitoring committee (DMC); summary of its role and reporting structure; statement of whether it is independent from the sponsor and competing interests; and reference to where further details about its charter can be found, if not in the protocol. Alternatively, an explanation of why a DMC is not needed | __19__      |
| 17 |                                 |     |                                                                                                                                                                                                                                                                                                                                       |             |
| 18 |                                 |     |                                                                                                                                                                                                                                                                                                                                       |             |
| 19 |                                 |     |                                                                                                                                                                                                                                                                                                                                       |             |
| 20 |                                 |     |                                                                                                                                                                                                                                                                                                                                       |             |
| 21 |                                 |     |                                                                                                                                                                                                                                                                                                                                       |             |
| 22 |                                 | 21b | Description of any interim analyses and stopping guidelines, including who will have access to these interim results and make the final decision to terminate the trial                                                                                                                                                               | __19__      |
| 23 |                                 |     |                                                                                                                                                                                                                                                                                                                                       |             |
| 24 |                                 |     |                                                                                                                                                                                                                                                                                                                                       |             |
| 25 | Harms                           | 22  | Plans for collecting, assessing, reporting, and managing solicited and spontaneously reported adverse events and other unintended effects of trial interventions or trial conduct                                                                                                                                                     | __20 - 21__ |
| 26 |                                 |     |                                                                                                                                                                                                                                                                                                                                       |             |
| 27 |                                 |     |                                                                                                                                                                                                                                                                                                                                       |             |
| 28 | Auditing                        | 23  | Frequency and procedures for auditing trial conduct, if any, and whether the process will be independent from investigators and the sponsor                                                                                                                                                                                           | __NA__      |
| 29 |                                 |     |                                                                                                                                                                                                                                                                                                                                       |             |
| 30 |                                 |     |                                                                                                                                                                                                                                                                                                                                       |             |
| 31 |                                 |     |                                                                                                                                                                                                                                                                                                                                       |             |
| 32 | <b>Ethics and dissemination</b> |     |                                                                                                                                                                                                                                                                                                                                       |             |
| 33 |                                 |     |                                                                                                                                                                                                                                                                                                                                       |             |
| 34 | Research ethics approval        | 24  | Plans for seeking research ethics committee/institutional review board (REC/IRB) approval                                                                                                                                                                                                                                             | __24__      |
| 35 |                                 |     |                                                                                                                                                                                                                                                                                                                                       |             |
| 36 |                                 |     |                                                                                                                                                                                                                                                                                                                                       |             |
| 37 | Protocol amendments             | 25  | Plans for communicating important protocol modifications (eg, changes to eligibility criteria, outcomes, analyses) to relevant parties (eg, investigators, REC/IRBs, trial participants, trial registries, journals, regulators)                                                                                                      | __19__      |
| 38 |                                 |     |                                                                                                                                                                                                                                                                                                                                       |             |
| 39 |                                 |     |                                                                                                                                                                                                                                                                                                                                       |             |
| 40 |                                 |     |                                                                                                                                                                                                                                                                                                                                       |             |
| 41 |                                 |     |                                                                                                                                                                                                                                                                                                                                       |             |
| 42 |                                 |     |                                                                                                                                                                                                                                                                                                                                       |             |

|    |                               |     |                                                                                                                                                                                                                                                                                     |                 |
|----|-------------------------------|-----|-------------------------------------------------------------------------------------------------------------------------------------------------------------------------------------------------------------------------------------------------------------------------------------|-----------------|
| 1  | Consent or assent             | 26a | Who will obtain informed consent or assent from potential trial participants or authorised surrogates, and how (see Item 32)                                                                                                                                                        | ___ 9 ___       |
| 2  |                               |     |                                                                                                                                                                                                                                                                                     |                 |
| 3  |                               |     |                                                                                                                                                                                                                                                                                     |                 |
| 4  |                               | 26b | Additional consent provisions for collection and use of participant data and biological specimens in ancillary studies, if applicable                                                                                                                                               | ___ NA ___      |
| 5  |                               |     |                                                                                                                                                                                                                                                                                     |                 |
| 6  |                               |     |                                                                                                                                                                                                                                                                                     |                 |
| 7  | Confidentiality               | 27  | How personal information about potential and enrolled participants will be collected, shared, and maintained in order to protect confidentiality before, during, and after the trial                                                                                                | ___ 17 - 18 ___ |
| 8  |                               |     |                                                                                                                                                                                                                                                                                     |                 |
| 9  |                               |     |                                                                                                                                                                                                                                                                                     |                 |
| 10 | Declaration of interests      | 28  | Financial and other competing interests for principal investigators for the overall trial and each study site                                                                                                                                                                       | ___ 24 ___      |
| 11 |                               |     |                                                                                                                                                                                                                                                                                     |                 |
| 12 |                               |     |                                                                                                                                                                                                                                                                                     |                 |
| 13 | Access to data                | 29  | Statement of who will have access to the final trial dataset, and disclosure of contractual agreements that limit such access for investigators                                                                                                                                     | ___ 24 ___      |
| 14 |                               |     |                                                                                                                                                                                                                                                                                     |                 |
| 15 |                               |     |                                                                                                                                                                                                                                                                                     |                 |
| 16 | Ancillary and post-trial care | 30  | Provisions, if any, for ancillary and post-trial care, and for compensation to those who suffer harm from trial participation                                                                                                                                                       | ___ NA ___      |
| 17 |                               |     |                                                                                                                                                                                                                                                                                     |                 |
| 18 |                               |     |                                                                                                                                                                                                                                                                                     |                 |
| 19 |                               |     |                                                                                                                                                                                                                                                                                     |                 |
| 20 | Dissemination policy          | 31a | Plans for investigators and sponsor to communicate trial results to participants, healthcare professionals, the public, and other relevant groups (eg, via publication, reporting in results databases, or other data sharing arrangements), including any publication restrictions | ___ 17 - 18 ___ |
| 21 |                               |     |                                                                                                                                                                                                                                                                                     |                 |
| 22 |                               |     |                                                                                                                                                                                                                                                                                     |                 |
| 23 |                               |     |                                                                                                                                                                                                                                                                                     |                 |
| 24 |                               | 31b | Authorship eligibility guidelines and any intended use of professional writers                                                                                                                                                                                                      | ___ NA ___      |
| 25 |                               |     |                                                                                                                                                                                                                                                                                     |                 |
| 26 |                               | 31c | Plans, if any, for granting public access to the full protocol, participant-level dataset, and statistical code                                                                                                                                                                     | ___ 24 ___      |
| 27 |                               |     |                                                                                                                                                                                                                                                                                     |                 |
| 28 |                               |     |                                                                                                                                                                                                                                                                                     |                 |
| 29 | <b>Appendices</b>             |     |                                                                                                                                                                                                                                                                                     |                 |
| 30 |                               |     |                                                                                                                                                                                                                                                                                     |                 |
| 31 | Informed consent materials    | 32  | Model consent form and other related documentation given to participants and authorised surrogates                                                                                                                                                                                  | _____           |
| 32 |                               |     |                                                                                                                                                                                                                                                                                     |                 |
| 33 |                               |     |                                                                                                                                                                                                                                                                                     |                 |
| 34 | Biological specimens          | 33  | Plans for collection, laboratory evaluation, and storage of biological specimens for genetic or molecular analysis in the current trial and for future use in ancillary studies, if applicable                                                                                      | _____           |
| 35 |                               |     |                                                                                                                                                                                                                                                                                     |                 |
| 36 |                               |     |                                                                                                                                                                                                                                                                                     |                 |

37 \*It is strongly recommended that this checklist be read in conjunction with the SPIRIT 2013 Explanation & Elaboration for important clarification on the items.  
 38 Amendments to the protocol should be tracked and dated. The SPIRIT checklist is copyrighted by the SPIRIT Group under the Creative Commons  
 39 "[Attribution-NonCommercial-NoDerivs 3.0 Unported](#)" license.  
 40
