# Supplementary material for: Peer-led family-centred problem management plus for immigrants (PMP-I) for mental health promotion among immigrants in USA: protocol for a pilot, randomised controlled feasibility trial
Source: PubMed Central journal article supplement (PMC9097550; doi:10.1136/bmjopen-2022-061353), 2022-04-28
Supplement: bmjopen-2022-061353.reviewer_comments.pdf [file bmjopen-2022-061353.reviewer_comments.pdf]

## PEER REVIEW HISTORY

BMJ Open publishes all reviews undertaken for accepted manuscripts. Reviewers are asked to complete a checklist review form (<http://bmjopen.bmj.com/site/about/resources/checklist.pdf>) and are provided with free text boxes to elaborate on their assessment. These free text comments are reproduced below.

## ARTICLE DETAILS

|                            |                                                                                                                                                                                                          |
|----------------------------|----------------------------------------------------------------------------------------------------------------------------------------------------------------------------------------------------------|
| <b>TITLE (PROVISIONAL)</b> | Peer-led family-centered Problem Management Plus for Immigrants (PMP-I) for mental health promotion among immigrants in the United States: protocol for a pilot, randomized controlled feasibility trial |
| <b>AUTHORS</b>             | Poudel-Tandukar, Kalpana; Jacelon, Cynthia; Martell, Christopher; Poudel, Krishna; Rai, Shan; Ramdam, Razu; Laws, Holly; Meyer, Jerrold; Bertone-Johnson, Elizabeth; Hollon, Steven                      |

This article was not externally reviewed at BMJ Open. Protocols that have been independently assessed prior to submission to BMJ Open are usually fast-tracked to publication on the grounds that further substantial changes will not be possible. This independent assessment will usually be external, independent review for both a substantial grant award from a non-commercial or government funder and ethics approval.
